# Supplementary material for: A two-gene-based prognostic signature for pancreatic cancer
Source: publisher site journal article supplement (doi:10.18632/aging.103698), 2020-09-23
Supplement: Supplementary file [file aging-v12i18-103698-supplementary-material-SD1.pdf]

SUPPLEMENTARY FIGURE

**A**

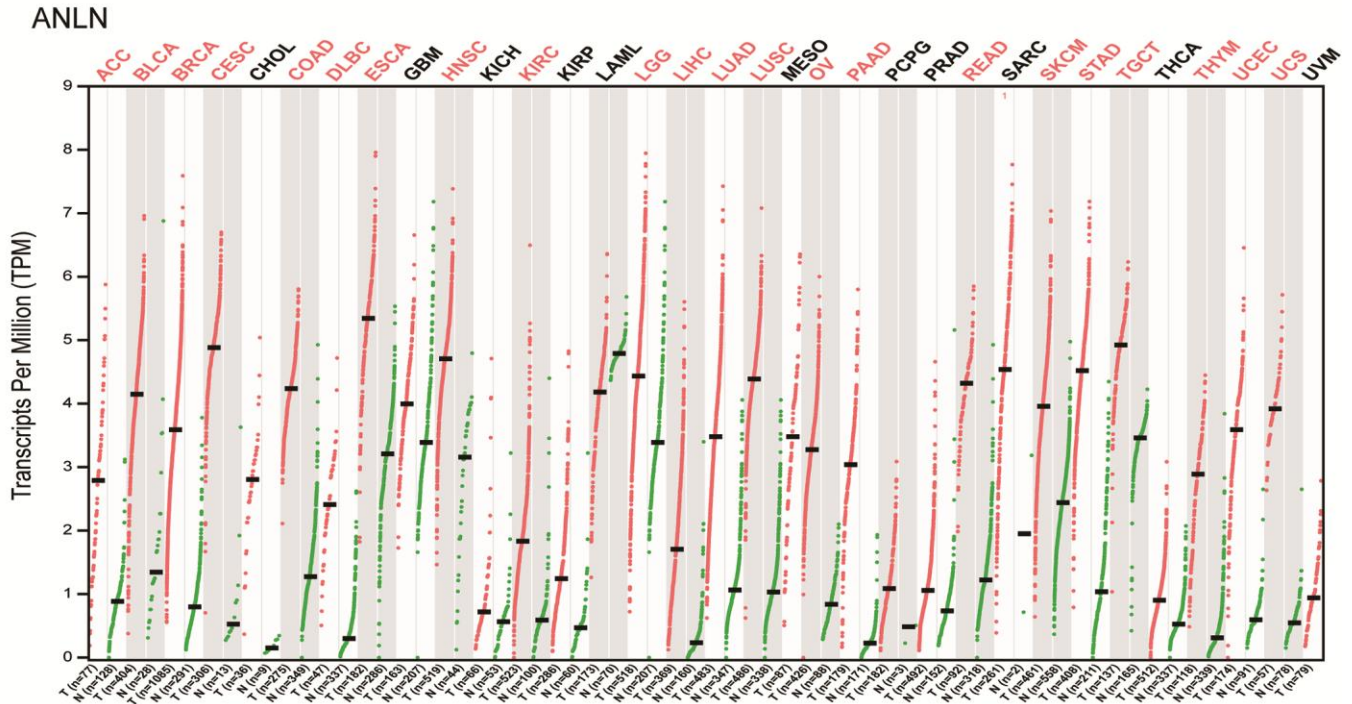

**B**

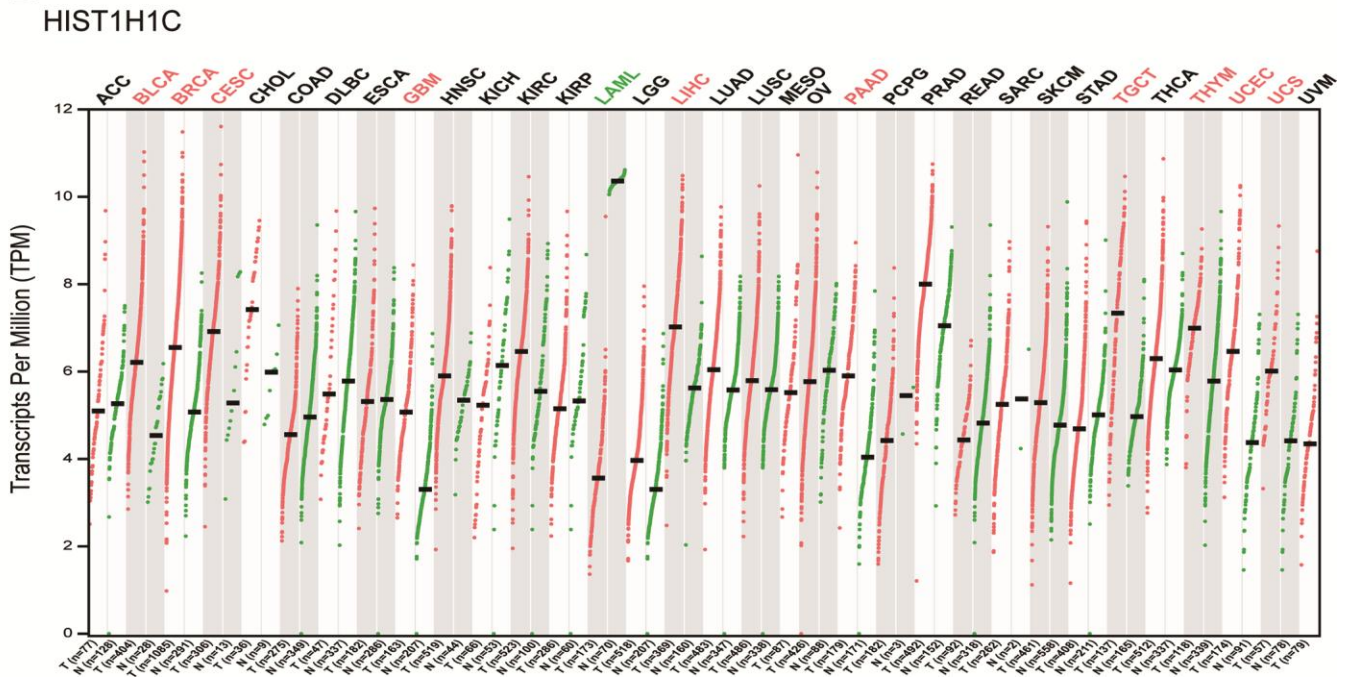

Supplementary Figure 1. The pancancer analysis of *ANLN* and *HIST1H1C* expression across multiple cancer types in GEPIA 2.0 database. Red tumor abbreviations indicated significant upregulation of *ANLN* and *HIST1H1C* in cancers, while green tumor abbreviations indicated significant downregulation of *ANLN* and *HIST1H1C*.
