# Supplementary material for: A two-gene-based prognostic signature for pancreatic cancer
Source: publisher site journal article supplement (doi:10.18632/aging.103698), 2020-09-23
Supplement: Supplementary file [file aging-v12i18-103698-supplementary-material-SD6.pdf]

## SUPPLEMENTARY TABLE

Supplementary Table 5. 3000 times lasso cox regression genes.

|    | Gene      | Times |
|----|-----------|-------|
| 1  | ECT2      | 316   |
| 2  | ANLN      | 2640  |
| 3  | HIST1H2BD | 0     |
| 4  | NEK2      | 0     |
| 5  | HIST1H2AC | 326   |
| 6  | CD36      | 1692  |
| 7  | HIST1H2BJ | 0     |
| 8  | ZMAT1     | 0     |
| 9  | CHEK1     | 0     |
| 10 | KIF4A     | 0     |
| 11 | CDC6      | 0     |
| 12 | BCL11A    | 0     |
| 13 | HIST1H2BC | 0     |
| 14 | CLK4      | 0     |
| 15 | HIST1H1C  | 2543  |
| 16 | HIST1H2BK | 0     |
| 17 | PLCG2     | 312   |
| 18 | MAP3K14   | 1     |
| 19 | GSDMC     | 0     |
| 20 | SCML4     | 0     |
| 21 | ZBTB32    | 0     |
| 22 | HRASLS2   | 0     |
| 23 | HIST1H4I  | 0     |
| 24 | GDPD5     | 30    |
| 25 | GYPC      | 0     |
| 26 | RNF166    | 0     |
| 27 | CCM2L     | 0     |
| 28 | LIMD2     | 948   |
| 29 | OXER1     | 0     |
| 30 | IL16      | 1673  |
| 31 | PSTPIP1   | 0     |
| 32 | AGER      | 0     |
| 33 | VENTX     | 0     |
| 34 | GH1       | 0     |
| 35 | BTNL9     | 0     |
