# Supplementary material for: A two-gene-based prognostic signature for pancreatic cancer
Source: Aging (Albany NY). 2020 Sep 23;12(18):18322–42. doi: 10.18632/aging.103698 (PMC7585105; doi:10.18632/aging.103698)
Supplement: Supplementary Table 1 [file aging-12-103698-s003..xlsx]

## Sheet: Supplementary Table 1. Common d
	Gene	TcgaFC	TcgaP	GSE28735.FC	GSE28735.P	GSE62452.FC	GSE28735.P.1
4	TSPAN1	2.86137	0.000729321	2.70064	2.61254e-18	2.34977	7.27892e-20
5	MLPH	2.22517	0.00182129	1.42331	8.86537e-18	1.20001	4.43097e-18
7	GALNT5	2.6274	0.00962573	2.77556	1.4963e-16	2.44659	1.34407e-19
8	STYK1	2.73334	0.000795076	1.22448	1.60211e-16	1.05153	3.57445e-18
14	MST1R	2.15708	0.00822355	1.13591	7.89026e-16	0.916163	2.43814e-16
21	ABHD17C	2.20575	0.00162245	1.06685	5.3428e-15	0.761897	1.56631e-12
22	LAMA3	2.35444	0.00477495	1.31156	6.90052e-15	1.18827	2.3055e-18
30	TMC7	1.81448	0.00925471	1.26007	2.11033e-14	1.11665	1.60986e-17
43	SLC4A11	2.60668	0.00214358	0.769035	1.17702e-13	0.5866	6.10075e-12
44	PYGB	1.59684	0.00292196	0.905864	1.38227e-13	0.823371	7.39276e-17
65	FXYD3	3.02514	0.000710734	1.4733	6.61171e-13	1.22545	2.16029e-13
66	NQO1	2.31314	0.00196968	1.43044	6.84286e-13	1.27342	1.91711e-14
67	AGR2	4.20379	0.00153267	2.08123	7.11055e-13	1.81431	5.38916e-14
84	B3GNT3	2.65204	0.000442956	0.838249	2.32361e-12	0.691484	1.18198e-12
91	ECT2	1.68773	0.00227577	1.30417	2.934e-12	1.16885	8.79367e-15
105	ERN2	3.81039	0.00218723	0.893713	4.49785e-12	0.702191	7.09645e-10
124	PI3	3.69648	0.00874697	0.846558	9.35952e-12	0.739787	3.73531e-11
149	SIM2	2.66669	0.0030485	0.812273	2.54559e-11	0.564127	5.00543e-10
150	KCNK1	2.08071	0.00134082	0.877954	2.57138e-11	0.703921	9.27277e-11
153	CEACAM1	1.86828	0.00720568	1.27233	2.67169e-11	1.08241	4.53706e-12
154	TTN	-1.0681	0.00193423	-1.48259	2.68066e-11	-1.22741	1.10051e-12
167	PRKCI	1.30185	0.00607586	0.653573	4.45394e-11	0.633579	8.03614e-13
168	SLC9A2	3.42617	0.00764384	1.09385	4.45556e-11	0.887865	6.01092e-11
175	ANLN	2.15844	0.0060675	1.65272	5.45929e-11	1.45903	2.28755e-13
184	NMU	3.55113	0.00757048	1.06534	7.07635e-11	0.881359	4.89274e-12
197	CORO2A	1.97015	0.00239892	0.933137	9.76039e-11	0.803564	3.10814e-13
233	FLRT2	-1.41515	0.00954377	-1.2504	1.48291e-10	-1.04472	2.08649e-10
258	IQGAP3	2.31298	0.00301516	0.576651	2.2032e-10	0.459237	5.30498e-10
269	SPDEF	4.01198	0.00132845	0.555654	2.80082e-10	0.380598	6.49222e-08
272	HIST1H2BD	2.43753	0.00103651	0.899129	2.88561e-10	0.662507	1.36778e-09
277	HIST2H2BE	2.23059	0.00127433	0.877059	3.31121e-10	0.673777	5.99265e-10
278	FOXQ1	2.11151	0.00737811	1.04418	3.40767e-10	0.935262	1.49034e-11
292	AFAP1-AS1	4.71367	0.00127847	1.26422	4.56363e-10	0.952749	1.0921e-09
306	PTK6	2.31053	0.00869173	0.632745	5.697e-10	0.461141	9.40549e-09
353	CAPN2	0.862129	0.00891126	0.56884	1.26256e-09	0.514492	7.47262e-11
361	PCDH1	1.39876	0.00437143	0.437463	1.36812e-09	0.330245	4.42036e-08
383	NEK2	2.04858	0.0037581	0.888936	2.06149e-09	0.71547	4.70555e-10
390	ATP2C2	2.22838	0.00498615	1.06673	2.33582e-09	0.790395	9.15949e-10
396	CDH23	-1.22989	0.000923998	-0.500801	2.51778e-09	-0.438005	7.10507e-11
405	UBE2T	1.47407	0.00426101	0.846945	2.89693e-09	0.725776	7.83283e-11
430	USP44	-1.23836	0.00832097	-0.560109	3.78611e-09	-0.467956	5.76462e-11
441	MISP	2.27424	0.00357065	0.773508	4.35196e-09	0.592319	1.39509e-08
447	MMP12	-3.93549	9.56021e-16	1.74763	4.81814e-09	1.42245	9.45955e-11
484	ABCA12	3.97027	0.00061142	0.65417	6.56229e-09	0.562337	1.32533e-08
554	HIST1H2AC	1.55682	0.00692925	0.49933	1.23482e-08	0.46374	1.3581e-09
556	TUFT1	1.28357	0.00870213	0.698837	1.23855e-08	0.585501	1.97008e-08
570	TMEM45B	2.39264	0.00359623	1.37514	1.46611e-08	1.11722	1.12174e-09
614	FHDC1	1.54562	0.00645604	0.55706	2.20943e-08	0.500706	9.56697e-10
641	AKAP7	-1.4229	0.00539979	-0.993911	2.6612e-08	-0.750148	4.61581e-08
642	CD36	-2.82119	1.44183e-08	-1.34076	2.6902e-08	-1.04593	2.54203e-06
671	TMEM131L	-1.74488	2.84612e-06	-0.715339	3.3808e-08	-0.660482	3.45704e-09
692	CAPN5	1.93573	0.00468564	0.510233	3.97528e-08	0.418889	5.35124e-09
700	HIST1H2BJ	2.57534	0.00697878	0.542121	4.18978e-08	0.388226	2.16775e-07
705	FAM83H	1.5192	0.0072599	0.554309	4.34078e-08	0.412085	1.60958e-07
754	ZMAT1	-1.26897	0.0055587	-0.60813	6.95162e-08	-0.376452	4.71167e-05
818	ALOX5AP	-1.27052	0.00309901	0.69928	1.11942e-07	0.66405	1.71265e-08
888	FCGR3A	-1.28841	0.0079796	0.923517	1.63098e-07	0.840431	7.42497e-09
901	NXF1	-0.552662	0.000775793	-0.264966	1.72776e-07	-0.21202	0.000255826
951	CHEK1	1.08175	0.00916085	0.669528	2.33001e-07	0.589441	3.06227e-09
1027	FUT2	1.93081	0.00738304	0.781304	3.75931e-07	0.57867	7.54448e-07
1037	KIF4A	1.53177	0.00865397	0.6855	3.93839e-07	0.573911	1.4668e-07
1040	CDC6	1.68247	0.00461595	0.817813	3.96344e-07	0.737926	4.1525e-09
1085	PNLDC1	-1.73013	0.00801771	-0.25965	4.76723e-07	-0.2562	3.13748e-06
1099	MAL2	1.68042	0.00766639	0.909474	5.16243e-07	0.824962	8.63311e-07
1143	BCL11A	-1.97732	6.8923e-05	-0.643085	6.26385e-07	-0.542767	1.51738e-08
1150	CDC42BPA	1.06711	0.00241502	0.430139	6.4715e-07	0.44227	8.75303e-09
1191	NPY1R	-2.26233	3.48314e-05	-0.826651	7.58155e-07	-0.653243	9.55329e-07
1215	HIST1H2BC	2.69183	0.00176039	0.544663	8.41915e-07	0.473461	1.76942e-06
1218	TNFRSF9	-1.72394	0.000421213	0.568306	8.54873e-07	0.486107	8.45477e-08
1245	PSCA	6.53141	0.00196836	0.477529	1.00736e-06	0.412279	1.27554e-05
1274	C1GALT1	1.0267	0.00704371	0.57609	1.17211e-06	0.617163	9.64768e-09
1343	PDE5A	-0.979879	0.00529585	-0.572571	1.57349e-06	-0.302669	0.00165528
1357	CGN	1.63162	0.00701841	0.644705	1.71126e-06	0.502041	1.89547e-06
1387	CLK4	-0.737835	0.00114378	-0.459781	1.90659e-06	-0.295782	0.000106439
1428	GPSM2	1.18425	0.00500112	0.781044	2.23158e-06	0.731713	2.68271e-08
1431	MUC13	3.64879	0.00145545	1.58456	2.25375e-06	1.4926	1.53544e-08
1436	HIST1H1C	2.04286	0.00666699	0.455513	2.28668e-06	0.375778	4.06441e-06
1455	DDC	4.79769	0.00466434	-0.793893	2.38326e-06	-0.631063	3.90306e-07
1466	SLC25A45	-1.03793	0.00316427	-0.327817	2.51345e-06	-0.346671	2.61995e-06
1480	RAB25	1.65033	0.00948218	0.90643	2.66007e-06	0.724445	1.82031e-05
1534	EXPH5	1.36761	0.00469828	0.464652	3.22433e-06	0.392505	1.15366e-06
1555	CAMK1D	-1.23182	0.00130025	-0.479984	3.6038e-06	-0.460771	4.60737e-08
1628	LRMP	-1.4746	0.00111922	-0.605648	4.55726e-06	-0.442792	1.25318e-05
1637	CTC1	-0.874729	0.00106902	-0.241057	4.76872e-06	-0.200264	5.16424e-05
1693	AMPD3	-0.767493	0.00305779	0.418635	5.70752e-06	0.405326	1.58035e-08
1726	ELOVL6	1.3494	0.00580113	0.429334	6.16208e-06	0.339032	1.3389e-05
1730	ABCA13	2.77035	0.00993213	0.536237	6.2439e-06	0.393757	1.37935e-05
1731	ITGA6	1.37242	0.00906535	0.505154	6.25612e-06	0.480985	4.21878e-06
1742	BTG1	-0.741176	0.00820865	-0.304804	6.46923e-06	-0.252538	3.90224e-05
1743	AIF1L	-2.45573	3.13119e-10	-0.48258	6.47538e-06	-0.359179	0.000188414
1744	ATP6V0D2	-1.32328	0.00532655	0.403158	6.47985e-06	0.276298	2.73763e-05
1770	AJAP1	-2.03087	0.000104883	-0.384318	6.93613e-06	-0.315471	1.01861e-06
1803	DCDC2	-1.68388	0.00296942	-1.34797	7.54109e-06	-1.22958	4.73812e-07
1845	AGR3	3.0117	0.00893395	0.749912	8.46486e-06	0.667842	4.84549e-06
1849	NCF2	-1.35622	0.00115842	0.824562	8.60989e-06	0.675055	1.88799e-06
1852	ACP5	-1.17635	0.00767986	0.533835	8.63181e-06	0.382497	1.73434e-05
1868	FABP4	-3.039	2.57086e-05	-1.61658	9.02882e-06	-1.25591	0.000153772
1922	CAMK2N1	1.43433	0.00207216	0.538658	1.04178e-05	0.574823	3.16945e-09
1944	CD300LF	-1.28956	0.00670194	0.352413	1.1024e-05	0.254268	2.82167e-05
1968	ACSM5	-1.60252	0.000594913	-0.257405	1.18228e-05	-0.222826	4.00234e-07
1982	OLR1	-1.94379	0.000624554	1.25169	1.25726e-05	1.21116	5.61905e-07
1990	MCEMP1	-1.88967	0.00501349	0.557845	1.27691e-05	0.330251	0.000470356
2001	CMTM8	1.15855	0.00871322	-0.64175	1.32237e-05	-0.614579	2.55543e-08
2006	ZBTB40	-0.806661	0.000922603	-0.265733	1.35331e-05	-0.173326	0.00107193
2011	LYVE1	-1.59983	0.00522984	-1.2742	1.37475e-05	-0.871757	0.000448099
2031	WDR91	-0.748262	0.00481025	-0.364167	1.46426e-05	-0.315835	0.000227948
2041	MUC1	2.47434	0.00710871	1.0684	1.49748e-05	0.81548	9.51077e-05
2100	HIST1H2BK	1.638	0.00763208	0.462024	1.78425e-05	0.335237	0.000297121
2117	PLCG2	-1.56431	1.20766e-05	0.345156	1.85107e-05	0.305294	6.06739e-05
2154	GGA2	-0.906673	8.04453e-05	-0.309811	2.01644e-05	-0.249801	1.55178e-05
2185	LRRC31	5.33037	0.00317739	0.566344	2.15764e-05	0.438823	8.9627e-06
2208	MAP3K14	-0.711473	0.00685593	-0.200822	2.27694e-05	-0.14875	0.000261049
2223	BACH2	-1.76897	7.82621e-05	-0.393793	2.3888e-05	-0.35389	3.31589e-06
2260	PPP2R2C	3.84035	0.00294847	0.454739	2.69177e-05	0.309199	0.0001401
2264	DENND3	-0.703353	0.00811321	0.55995	2.73138e-05	0.516316	4.70404e-07
2298	GSDMC	-1.73454	0.00807032	0.68685	2.9829e-05	0.607508	3.2578e-06
2305	TLCD1	1.68371	0.00112801	0.300079	3.04152e-05	0.195516	0.000193506
2310	CPD	1.04941	0.00786347	0.283673	3.12254e-05	0.306276	5.72523e-06
2312	SCML4	-1.8846	0.000244588	-0.202827	3.1365e-05	-0.144792	0.000505655
2350	ZNF676	-1.3334	0.00587015	-0.473822	3.49869e-05	-0.285184	0.00216463
2371	RFX4	-1.85947	0.00123587	-0.126467	3.67856e-05	-0.139022	7.83357e-07
2414	ZBTB32	-1.22154	0.00909044	-0.161832	4.09198e-05	-0.131907	0.000478723
2415	HRASLS2	3.81097	0.00472196	0.558863	4.13012e-05	0.496127	1.10291e-06
2445	GPR182	-3.5961	5.21364e-18	-0.291346	4.51943e-05	-0.327873	9.01811e-08
2472	HIST1H4I	1.6747	0.00789283	0.248818	4.88852e-05	0.190807	4.48229e-05
2514	TFF2	5.42906	0.00797527	1.09603	5.32094e-05	0.896009	2.60467e-05
2548	SH3TC2	2.68302	0.000826829	0.253014	5.69172e-05	0.170933	0.000717338
2577	CNTFR	-1.92947	0.00826609	-0.308049	5.93367e-05	-0.308589	4.36362e-06
2621	GDPD5	-1.3394	8.34822e-06	-0.311747	6.43375e-05	-0.291687	9.54498e-06
2623	PBK	1.86556	0.00525772	0.563277	6.46582e-05	0.511305	2.29941e-06
2681	TSTA3	1.48966	0.0068765	0.453276	7.43756e-05	0.289222	0.00205862
2689	SNX22	-1.68096	0.000181759	-0.206421	7.51693e-05	-0.246918	7.40306e-08
2737	ZNF318	-0.826647	0.00085572	-0.214472	8.31068e-05	-0.163728	0.000196121
2738	TBX21	-2.71749	1.18831e-09	-0.188328	8.32126e-05	-0.219844	0.000116264
2740	TMEM26	-1.21047	0.00386018	0.260203	8.33441e-05	0.179218	0.000192531
2758	PLEKHA2	-0.743217	0.00735655	0.442654	8.75785e-05	0.539861	6.36372e-08
2808	GYPC	-0.985811	0.00816745	-0.32219	9.74398e-05	-0.276563	1.61523e-05
2845	NEURL3	-1.90492	0.00156879	-0.224334	0.000107572	-0.243141	9.24867e-07
2876	RNF166	-1.14883	1.56658e-05	-0.234367	0.000114386	-0.260701	8.46712e-07
2883	UBXN10	1.7449	0.00663597	0.321946	0.000116358	0.353486	2.22682e-07
2953	GALNT12	1.60029	0.00884712	0.448042	0.000130628	0.418662	4.04467e-05
2963	FGFBP1	4.49627	0.00481235	0.486862	0.000133707	0.417829	1.33842e-05
2967	TP53INP1	-0.997869	0.00163462	-0.463264	0.000134331	-0.460007	6.97459e-06
3014	CCM2L	-2.16547	6.84726e-11	-0.197085	0.000146946	-0.22722	2.84408e-06
3118	LIMD2	-1.82674	4.65409e-05	-0.202	0.000182908	-0.267178	6.60539e-06
3165	CD68	-1.98101	1.11685e-07	0.526101	0.000196336	0.472716	5.81247e-05
3182	SLC7A11	2.87303	0.0010477	0.824652	0.000202443	0.608817	0.000435668
3235	HAVCR2	-1.16867	0.00608957	0.402317	0.000222736	0.337294	0.000112702
3246	LINC00173	-2.68983	1.86056e-06	-0.266156	0.000226761	-0.291545	7.9417e-06
3267	SLC16A6	-1.26088	0.00312818	0.494651	0.000238326	0.388168	0.000281457
3275	SPINK5	3.18112	0.0062905	0.645918	0.000242839	0.451959	0.000275282
3301	ACSM3	-1.80695	0.000107117	-0.975873	0.000253557	-0.88187	2.57366e-05
3305	OXER1	-1.18115	0.00120816	-0.243901	0.000257133	-0.241006	1.2972e-05
3315	NCR3	-2.26936	0.000132667	-0.155754	0.000262768	-0.20024	2.69602e-06
3320	IFI30	-1.1541	0.00399743	0.551828	0.000265432	0.458761	0.000247258
3337	ARHGEF16	1.59165	0.00628826	0.213984	0.000272738	0.150633	0.00177957
3344	CCL2	-2.18722	6.82403e-06	-0.80274	0.000276425	-0.630767	0.000970414
3352	SMAGP	1.66051	0.00218111	0.231818	0.000285235	0.188007	0.000540821
3356	USH1C	1.87949	0.00787918	0.491494	0.000286941	0.419233	3.08204e-05
3367	IL16	-1.40859	0.00385275	0.359075	0.000294828	0.349467	5.57632e-06
3461	PTPRO	-1.39357	0.000990071	0.291492	0.000347476	0.264028	1.82996e-05
3465	CD300A	-1.61878	5.22178e-06	0.395833	0.000349136	0.328507	7.69601e-05
3493	GLYAT	-2.51912	0.00837362	-0.375316	0.000367545	-0.275039	0.000577874
3503	FMNL3	-0.862844	0.00421077	0.452987	0.000374942	0.444584	4.17129e-06
3544	ETV4	2.07022	0.00471224	0.278903	0.000414186	0.199097	0.00116608
3586	AICDA	-2.05365	0.00836936	-0.158224	0.000444232	-0.174907	3.57371e-05
3590	BTN2A2	-1.03302	0.000742136	0.355556	0.000450308	0.340976	4.44155e-06
3602	TRIM22	-1.37344	0.000320167	0.420448	0.000462607	0.539279	3.42011e-07
3620	YPEL1	-1.08642	0.000364268	-0.209656	0.000480626	-0.19638	6.35275e-05
3642	ARHGAP32	1.13777	0.0071187	0.377435	0.000498637	0.369741	0.000113073
3705	SPATA13	-0.962456	1.39056e-05	-0.374379	0.000566716	-0.315817	0.000656573
3708	RAB42	-1.62922	6.87221e-05	0.249404	0.000567751	0.177247	0.0011744
3730	PSTPIP1	-1.41215	0.000896001	-0.173635	0.000593101	-0.210333	1.34063e-06
3745	SLC15A3	-1.05307	0.00274193	0.466011	0.000612931	0.339965	0.000974365
3762	TRANK1	-0.736087	0.00740627	0.53737	0.000630155	0.650205	4.11941e-07
3783	CDS1	1.38166	0.00318978	0.506382	0.000656021	0.418577	0.000434709
3789	CALML4	1.5157	0.00904489	0.267422	0.000663566	0.245878	5.69559e-05
3803	ZKSCAN4	-0.527993	0.00975486	0.165595	0.000678795	0.162819	8.22494e-05
3832	CHODL	-1.93093	0.000123373	-0.153327	0.000709707	-0.151458	2.59138e-05
3839	BAALC	-1.50274	0.000610355	-0.185016	0.000713706	-0.178313	0.000266691
3875	AGER	-1.10681	0.00344531	-0.170022	0.000754431	-0.240534	5.08934e-06
3932	LAPTM5	-1.45709	0.000309164	0.552353	0.000833395	0.533962	0.00010773
3937	FCER1G	-1.2392	0.00269997	0.494655	0.000837268	0.400146	0.00123271
3946	ANKS4B	3.15785	0.0047526	0.439159	0.000849752	0.323431	0.000662638
3955	ENTPD8	3.23256	0.00647607	-0.177198	0.000864427	-0.207554	2.64974e-05
3980	MUC5B	4.90391	0.00334938	0.673605	0.00090213	0.581874	0.00056657
3984	RFTN1	-0.896963	0.00877416	0.461393	0.000910446	0.490536	4.14146e-06
4023	MYO9B	-0.867283	6.4874e-05	0.319414	0.000965401	0.300376	0.00016388
4045	COL4A3	-2.46422	1.02306e-05	-0.14433	0.000991667	-0.124161	0.000859451
4058	CA13	1.4676	0.00551322	0.417467	0.00102014	0.323424	0.000713205
4061	PDE2A	-1.84857	3.6567e-06	-0.2902	0.00102504	-0.259652	0.00183936
4077	SLC22A18AS	1.85294	0.00933909	0.182099	0.00103993	0.165173	0.000483603
4096	C5orf56	-0.893636	0.00134989	-0.181819	0.00107604	-0.148663	0.000794513
4111	TBATA	-2.15135	0.000393485	-0.12802	0.00110444	-0.145862	6.08193e-06
4114	VENTX	-1.14102	0.00743923	-0.201142	0.00110862	-0.308718	9.92855e-07
4120	HTR1D	2.74129	0.00373645	0.405364	0.0011238	0.344557	0.000138993
4128	RBP7	-1.50484	0.00143933	-0.465665	0.0011356	-0.468671	0.00239711
4150	NLRC5	-1.27044	0.000119183	0.318944	0.00117783	0.263317	0.00033662
4168	GH1	-2.00258	0.00469182	-0.167666	0.00120224	-0.27738	0.000170017
4176	FCGR2B	-1.43105	0.00263863	0.484303	0.00122286	0.504051	1.93754e-05
4193	PLIN1	-2.29937	0.00495735	-0.620286	0.00126649	-0.47718	0.00155465
4194	ALPG	7.50104	0.00936567	-0.233126	0.00126732	-0.266357	7.21669e-05
4225	PLA2G7	-1.32326	0.0097474	0.817761	0.00132823	0.740038	0.000205296
4242	MYBPC3	-1.48823	0.00173178	-0.19133	0.00136672	-0.225597	4.48552e-05
4284	HBB	-3.10249	4.02669e-06	-0.809806	0.00144893	-0.696369	0.00116463
4296	PLIN4	-2.24168	0.00306739	-0.481265	0.00147765	-0.486951	1.40963e-05
4356	ITGB2	-1.38474	0.000920748	0.461818	0.0016475	0.419977	0.000155994
4371	IDI2-AS1	-3.27974	5.55679e-15	-0.140033	0.00169456	-0.131091	0.000993288
4399	TOX3	2.27332	0.00165072	0.437303	0.00179145	0.352838	0.00104664
4412	SLC7A10	-3.00777	0.000594028	-0.235998	0.00184958	-0.24837	7.34173e-05
4441	BTNL9	-1.65333	0.000132641	-0.317886	0.00194188	-0.340352	0.000503389
4463	PLXNA2	1.56931	0.000282833	-0.515704	0.0020116	-0.581115	5.53815e-05
4466	C12orf42	-2.70935	0.00026487	-0.143568	0.00203396	-0.133733	0.000559227
4471	EMP2	1.21055	0.00381683	0.287178	0.00204955	0.318425	3.51058e-05
4517	ITSN2	-0.574092	0.008927	-0.193978	0.00218844	-0.181841	0.000672417
4564	PPP1R9B	-0.522357	0.00386271	0.255754	0.00238012	0.210927	0.00180703
4573	ADRA1A	-3.37708	1.88385e-12	-0.129833	0.00240661	-0.124625	0.000453124
4604	RALGPS2	-1.04698	0.000205408	0.358779	0.00254933	0.389743	0.000109021
4618	TLR6	-1.47816	0.000217116	0.40543	0.00262847	0.385289	0.000144586
4643	CLEC17A	-2.68368	0.000294675	-0.211008	0.00271	-0.19125	0.0005241
4651	S1PR5	-1.47731	0.00228939	-0.157025	0.00276735	-0.201106	0.000198138
4659	KEL	-2.67249	5.32204e-06	-0.126232	0.00278736	-0.169207	6.636e-06
