# Supplementary material for: A two-gene-based prognostic signature for pancreatic cancer
Source: Aging (Albany NY). 2020 Sep 23;12(18):18322–42. doi: 10.18632/aging.103698 (PMC7585105; doi:10.18632/aging.103698)
Supplement: Supplementary Table 2 [file aging-12-103698-s008..xlsx]

## Sheet: Supplementary Table 2. heatmap 
	TCGA-YB-A89D-11A-11R-A36G-07	TCGA-HV-A5A3-11A-11R-A26U-07	TCGA-H6-8124-11A-01R-2404-07	TCGA-H6-A45N-11A-12R-A26U-07	TCGA-IB-AAUS-01A-12R-A38C-07	TCGA-IB-8127-01A-11R-2404-07	TCGA-HZ-A4BH-01A-11R-A26U-07	TCGA-HZ-8001-01A-11R-2204-07	TCGA-3A-A9IN-01A-11R-A39D-07	TCGA-3E-AAAZ-01A-11R-A38C-07	TCGA-LB-A9Q5-01A-11R-A39D-07	TCGA-FB-AAPP-01A-12R-A41B-07	TCGA-US-A776-01A-13R-A33R-07	TCGA-HZ-7922-01A-11R-2156-07	TCGA-3A-A9IZ-01A-12R-A41B-07	TCGA-IB-AAUW-01A-12R-A38C-07	TCGA-HZ-8005-01A-11R-2204-07	TCGA-2J-AAB4-01A-12R-A41B-07	TCGA-XD-AAUH-01A-42R-A41B-07	TCGA-2J-AABT-01A-11R-A41B-07	TCGA-IB-A5SS-01A-11R-A32O-07	TCGA-S4-A8RM-01A-11R-A37L-07	TCGA-FB-AAQ2-01A-31R-A41B-07	TCGA-F2-7273-01A-11R-2156-07	TCGA-IB-8126-01A-11R-2404-07	TCGA-XD-AAUG-01A-61R-A41B-07	TCGA-HV-A7OP-01A-11R-A33R-07	TCGA-XD-AAUI-01A-42R-A41B-07	TCGA-HV-A5A4-01A-11R-A26U-07	TCGA-H8-A6C1-01A-11R-A32O-07	TCGA-HV-A5A5-01A-11R-A26U-07	TCGA-OE-A75W-01A-12R-A32O-07	TCGA-US-A779-01A-11R-A32O-07	TCGA-RB-AA9M-01A-11R-A39D-07	TCGA-IB-7886-01A-11R-2156-07	TCGA-IB-AAUO-01A-12R-A38C-07	TCGA-2J-AABU-01A-11R-A41B-07	TCGA-HZ-8636-01A-21R-2404-07	TCGA-HZ-A9TJ-01A-11R-A41I-07	TCGA-LB-A7SX-01A-11R-A33R-07	TCGA-IB-7890-01A-12R-2204-07	TCGA-HZ-A49G-01A-11R-A26U-07	TCGA-3A-A9IL-01A-11R-A38C-07	TCGA-YB-A89D-01A-12R-A36G-07	TCGA-HZ-7925-01A-11R-2156-07	TCGA-3A-A9IS-01A-21R-A39D-07	TCGA-2J-AAB9-01A-11R-A41B-07	TCGA-3A-A9IH-01A-12R-A39D-07	TCGA-IB-7654-01A-11R-2156-07
ALPG	3	0	1	1	117	455	28	4	0	14	13	5	104	77	20	3	6	5	5	108	12	1	338	3	0	2	3	53	79	129	18	168	1	209	377	20	7	5	4	9618	25	30	0	19	10802	0	2	8	0
PSCA	329	13	155	1	5381	1134	17823	37030	19	25244	7095	0	20	51450	4314	8032	435	540	779	273	10296	1207	87330	4980	27	5638	22	634	1436	2226	64	82923	32759	3218	6145	3283	8788	9149	3470	31122	31526	19751	6	1517	5804	111	402	15235	19757
TFF2	1019	19	99	0	2659	7800	1739	4080	0	7985	8069	2412	8711	8864	8113	16503	693	10729	1602	563	772	75734	117	2484	602	7054	25029	15684	10716	27482	898	11068	2514	4358	4679	5940	55	696	2564	790	1839	3762	124	2478	521	0	116	143812	67
LRRC31	18	0	1	2	14	760	37	8	21	106	26	2461	3502	92	27	193	32	158	20	54	45	1161	52	10	25	35	0	57	451	294	18	159	334	9	616	53	12	242	339	114	4	196	14	78	36	0	3	50	61
MUC5B	1236	587	850	14	12187	2353	3767	7996	64	20554	921	37575	20570	9449	13476	43013	799	4396	1218	8045	24599	9144	6508	27899	5636	3568	5456	6889	27325	3915	22713	16599	1903	6888	19826	5301	1962	4010	72862	14901	2029	19074	320	2184	1469	11	1234	33503	898
DDC	51	26	58	14	43	821	411	551	836	432	205	239	281	101	12	580	256	371	773	627	8	771	389	314	512	511	197	419	407	1017	547	470	591	343	1381	42	60	660	213	86	164	120	4647	734	766	18793	43	223	231
AFAP1-AS1	214	30	29	6	690	3615	551	2455	4	2027	1323	36	124	358	2273	452	5920	3112	334	627	6066	8285	2860	800	309	277	2	1137	1706	1109	1294	3175	3724	1844	2314	2691	803	2230	2111	1260	1298	862	19	1061	1365	1	246	6382	5508
FGFBP1	48	16	42	6	691	268	2317	4225	0	334	485	120	118	221	1556	335	394	877	85	52	2513	23	2394	182	87	93	121	285	476	89	97	157	394	326	57	762	637	56	285	3310	1721	270	7	1019	683	0	391	6274	77
AGR2	6651	550	632	3	5061	25429	16292	24110	64	73545	7951	187763	237191	29256	44166	33421	4175	23327	6778	8026	15952	111189	7629	13114	4491	9152	35460	14190	22314	43542	12149	35891	48391	14793	64940	10120	5883	47779	53640	14165	5336	11320	335	25521	20297	1	5583	46836	30310
SPDEF	325	27	60	3	1060	2232	2677	480	11	855	521	8109	26354	1134	1001	854	725	1125	284	436	1490	1023	319	756	286	700	573	546	1253	1708	1142	3690	2127	1646	1911	982	273	1291	1451	2297	182	977	45	1464	1292	9	62	1829	9
ABCA12	27	7	14	4	144	154	233	179	3	74	46	1	32	602	101	202	488	248	52	14	93	305	143	412	41	15	6	180	157	94	261	29	143	368	6	193	145	866	328	448	117	152	4	87	1066	4	109	629	253
PPP2R2C	57	27	84	59	101	2636	151	353	1579	200	261	16	15	537	135	235	3380	3132	469	120	3937	9	4640	395	81	230	85	944	244	304	115	127	339	674	645	1272	960	1142	16	2016	578	59	493	428	1800	3717	136	1968	281
HRASLS2	57	4	5	3	279	374	1852	350	13	116	51	11	249	257	63	109	163	643	39	51	33	33	1660	34	18	56	4	287	80	389	30	478	959	112	185	1159	427	69	32	1658	585	112	3	109	1295	1	23	198	508
ERN2	1139	89	48	8	1252	6746	5841	2124	0	10578	768	13211	21377	2743	3199	5723	39	4080	2092	2581	2476	15749	2263	1545	739	1541	2964	2215	10223	9417	2904	14803	12375	2626	4511	3199	960	5190	4587	7147	1074	3902	116	4848	2465	0	301	5866	9794
PI3	316	116	68	34	1386	1584	1482	3929	2	152	1113	14	170	5128	259	387	51	4029	521	1884	588	2060	3409	854	123	499	3532	1539	2377	5795	5805	693	1349	272	746	6790	697	1372	1240	13035	158	163	39	3218	1341	0	367	543	83
MUC13	1313	722	1803	11	2386	24567	12305	3286	10097	15296	1668	37894	63753	14397	11620	6977	788	20480	1586	4062	591	17979	926	7960	3567	1717	3708	12487	13297	6175	6893	9016	3186	4305	35247	2659	949	23085	3773	22839	1714	4637	2328	4346	23264	21730	1079	18629	9163
NMU	145	3	0	2	106	503	1458	671	9	1686	342	35	453	284	770	105	68	1510	114	87	1407	574	2128	24	62	43	608	650	108	349	96	352	807	252	342	339	349	383	145	415	583	272	0	218	161	6	110	784	110
SLC9A2	138	14	18	10	145	758	817	179	50	2117	336	253	442	637	297	560	77	459	282	127	196	3655	56	92	114	145	1153	812	53	997	75	492	1124	50	191	61	54	1337	236	956	424	142	4	515	109	11	101	365	2856
ENTPD8	118	78	53	6	73	728	30	128	100	438	157	4883	6449	321	226	1032	47	665	31	135	477	923	107	366	134	98	167	207	294	214	490	2998	3872	470	284	1411	93	359	431	1485	130	268	37	532	52	37	42	398	497
SPINK5	137	27	53	2	80	2445	489	805	81	83	149	1588	3389	44	87	546	155	583	128	263	36	1735	172	157	81	182	3	367	370	1087	172	1573	957	165	201	233	108	572	461	695	135	232	267	1187	253	41	130	467	90
ANKS4B	226	30	45	0	178	1764	294	123	965	609	54	3008	2264	383	330	896	125	458	148	270	116	1407	154	476	75	140	14	495	865	823	687	748	1473	523	1589	249	47	1114	417	722	147	333	32	621	1468	5378	62	356	1974
FXYD3	6314	765	623	20	3144	16256	10015	31732	5810	15915	3692	19469	66947	15564	26394	7575	6348	41262	4498	4372	39005	15856	24617	3519	2181	2651	40988	11420	13299	13911	12572	35867	27511	4307	30557	27848	6322	19614	19921	23433	5372	9314	865	14977	12806	1893	2250	26241	8945
AGR3	612	134	336	0	424	4002	1429	1006	28	4933	231	5485	7498	461	2163	3715	31	2385	666	892	1774	8047	355	2080	506	661	2508	1177	2766	2240	763	4346	2910	1819	2985	697	390	1602	9368	534	485	1018	32	1244	3607	0	243	4059	793
SLC7A11	175	113	162	65	476	1469	425	494	556	495	801	2941	5287	2000	1019	485	1258	646	181	226	777	949	1112	267	392	76	74	778	284	322	556	582	314	267	3365	670	423	784	1997	560	470	281	103	584	494	134	140	1927	2598
TSPAN1	5860	1056	1068	51	5173	39383	15242	18393	675	18682	6904	11204	32397	36829	31594	12350	10447	31112	4338	4215	17887	15070	31611	6665	1181	1611	1762	6015	19696	8690	7348	17391	31540	9712	27573	24557	8403	25401	19256	7633	4877	10776	194	14775	25871	1506	1754	43876	21231
AJAP1	107	887	1444	163	198	217	26	66	157	25	134	0	29	58	133	376	10	596	46	28	104	149	9	240	156	61	8	67	110	87	201	127	154	511	192	152	4	55	149	26	25	404	167	68	52	242	88	235	158
AICDA	11	0	6	274	16	21	2	15	3	5	1	0	0	7	4	68	5	1	7	4	2	6	13	11	22	7	3	62	4	1	3	0	1	1	5	12	1	10	4	7	2	1	1	3	9	7	3	5	15
TBATA	4	0	5	23	2	2	4	2	0	7	1	0	0	2	1	1	3	2	1	1	0	2	1	0	1	1	3	1	0	2	1	1	0	0	4	7	2	3	0	2	2	2	3	1	3	0	0	3	2
CCM2L	253	166	266	2340	353	104	303	437	636	217	139	25	70	115	27	431	25	99	298	123	130	342	94	291	174	136	32	185	142	145	232	207	140	307	111	93	26	175	85	93	121	157	379	153	208	166	76	162	209
CCL2	7185	16922	13355	141	2917	1843	2066	6141	4923	870	1377	43	247	978	1659	4656	484	4395	6185	1231	3133	335	290	5010	4217	1438	23	2018	898	1855	2149	1547	402	8918	1904	5189	68	3762	1039	2486	487	3241	1298	1994	5037	332	2370	1812	921
PLIN4	20592	270	142	164	102	280	5245	6457	6140	5246	176	7	14	28	135	2830	188	233	15639	8285	102	419	166	498	8073	885	66	148	402	244	197	67	443	1064	58	259	175	88	274	129	60	829	173	147	56	10	146	106	1114
NPY1R	172	170	805	3682	78	669	98	199	684	53	396	21	21	396	256	503	13	360	134	135	111	144	106	215	223	93	5	180	1695	87	145	17	376	315	51	172	34	580	87	149	357	312	206	109	55	399	260	1209	640
NCR3	39	39	23	704	45	28	69	144	8	2	11	4	10	24	3	35	11	12	190	16	14	32	29	9	59	12	8	50	14	53	21	41	3	15	51	27	8	45	14	34	6	16	8	21	15	1	5	19	30
PLIN1	7133	15	17	91	6	37	1905	2713	1991	10	26	6	14	10	47	822	18	51	6405	8	10	75	53	193	4099	388	7	65	61	38	27	15	24	312	18	43	19	18	10	104	7	309	31	69	10	7	14	31	653
AIF1L	775	392	487	11505	604	1875	698	1281	1540	1198	471	104	983	227	69	1161	557	198	960	393	693	240	532	645	687	450	410	1021	138	254	426	296	235	1083	309	503	215	935	267	1204	114	386	436	325	767	569	169	639	417
COL4A3	48	22	167	3904	100	199	306	119	300	58	37	13	97	83	41	505	10	127	384	27	28	61	80	430	286	142	5	726	41	188	44	14	26	113	49	348	20	206	695	142	149	103	101	65	29	7	46	1099	121
GLYAT	103	0	0	2	0	0	8	21	35	0	1	0	8	3	0	8	2	0	62	0	0	0	0	0	20	3	3	0	0	3	0	1	15	5	1	2	0	0	0	2	0	1	0	1	0	0	0	0	4
KEL	187	176	54	862	74	58	22	24	15	16	16	3	3	22	9	73	7	109	51	18	5	12	12	43	24	5	2	67	75	45	66	19	16	30	23	19	3	32	7	22	5	66	34	22	11	12	19	17	21
CLEC17A	39	45	26	1516	19	12	85	170	6	12	13	0	4	44	2	73	0	21	340	13	5	24	42	115	94	31	17	93	11	63	17	1	8	36	7	4	13	7	7	9	2	3	12	20	13	4	5	4	35
LINC00173	6	19	10	367	9	18	16	13	6	14	4	0	3	5	5	31	7	29	38	21	1	6	3	6	35	2	7	18	9	1	5	9	2	3	3	56	3	14	4	16	1	28	15	4	4	1	4	13	1
C12orf42	4	1	5	302	2	6	6	15	4	0	1	8	26	10	1	24	0	1	53	6	2	3	2	18	21	12	0	19	0	14	1	0	2	3	4	0	5	8	12	0	0	5	6	3	1	0	1	4	5
TBX21	41	64	121	1282	102	106	91	113	29	35	19	1	7	21	3	87	65	67	109	20	21	53	32	148	151	17	16	70	31	23	53	125	8	39	58	36	15	67	13	28	6	55	22	40	19	11	19	16	21
CD36	24375	691	1592	13289	2084	1525	3758	5962	2958	704	918	29	155	661	100	2969	166	1415	6867	728	833	400	416	2367	4151	998	15	1081	351	875	960	156	193	1069	967	170	80	1467	146	382	719	3292	919	853	239	873	411	488	2372
SLC7A10	408	1	1	20	1	1	55	142	25	0	4	1	0	0	1	29	0	3	373	0	3	1	3	3	85	5	4	12	1	2	0	0	3	12	0	1	1	4	0	2	0	4	32	2	2	0	1	4	16
FABP4	27837	64	183	51	306	160	4785	9048	2435	424	240	11	154	66	21	2395	17	52	13051	212	445	51	275	574	7053	471	9	315	79	46	70	125	105	636	35	74	72	286	52	45	67	442	210	231	224	4	126	111	1155
HBB	29098	185	120	16736	909	92	635	78298	2346	2737	3154	74	185	56	497	4565	163	54	3432	72	111	435	127	2212	2427	358	172	264	63	296	114	6071	240	2278	284	125	510	204	18	69	1621	344	472	7592	81	155	69	1424	337
IDI2-AS1	2	147	4	20	3	5	3	2	3	9	0	0	6	10	6	6	1	7	2	3	1	12	2	2	3	1	3	4	6	4	3	5	6	4	1	18	2	12	4	23	0	6	4	5	4	1	2	4	3
ADRA1A	52	1	2	319	14	8	11	9	12	30	3	0	15	9	3	13	1	3	50	14	3	2	16	16	22	3	7	22	11	3	8	1	1	14	6	2	4	19	7	0	4	4	20	1	10	1	4	14	7
GPR182	12	14	21	648	18	10	10	29	23	14	6	0	7	9	9	13	5	12	23	14	16	6	4	11	28	7	0	6	3	5	8	5	18	20	8	16	2	11	7	9	7	67	21	25	7	3	2	4	13
MMP12	40393	964	4439	66	2084	627	538	181	16	180	296	64	87	519	401	317	912	694	48	274	3865	260	712	461	152	102	21	1108	218	1182	61	160	200	413	429	178	160	1814	255	103	887	3849	189	3197	224	9	307	787	485
[truncated: 133 more columns]
