# Supplementary material for: A two-gene-based prognostic signature for pancreatic cancer
Source: Aging (Albany NY). 2020 Sep 23;12(18):18322–42. doi: 10.18632/aging.103698 (PMC7585105; doi:10.18632/aging.103698)
Supplement: Supplementary Table 4 [file aging-12-103698-s009..xlsx]

## Sheet: Supplementary Table 4. The feat
	id	TSPAN1	MLPH	GALNT5	STYK1	MST1R	ABHD17C	LAMA3	TMC7	SLC4A11	PYGB	FXYD3	NQO1	AGR2	B3GNT3	ECT2	ERN2	PI3	SIM2	KCNK1	CEACAM1	TTN	PRKCI	SLC9A2	ANLN	NMU	CORO2A	FLRT2	IQGAP3	SPDEF	HIST1H2BD	HIST2H2BE	FOXQ1	AFAP1-AS1	PTK6	CAPN2	PCDH1	NEK2	ATP2C2	CDH23	UBE2T	USP44	MISP	MMP12	ABCA12	HIST1H2AC	TUFT1	TMEM45B	FHDC1
1	TCGA-2J-AAB4	31112	11811	2704	953	8406	5289	15630	882	383	17359	41262	10769	23327	6522	1610	4080	4029	923	6094	3669	839	3475	459	1388	1510	3686	5348	2900	1125	233	1676	1189	3112	4320	29818	12371	569	2363	180	635	93	5064	694	248	1810	4179	5626	997
2	TCGA-2J-AAB6	17768	7081	6678	491	7783	2584	66894	672	1377	56982	28242	3423	3865	3958	2424	380	4315	284	2279	17970	102	2547	81	4468	2949	1195	395	2145	1063	652	1871	1231	125	7056	31660	7537	654	313	200	603	4	4386	76	311	1961	3112	494	393
3	TCGA-2J-AAB8	5987	6645	1699	301	2158	2886	5939	794	853	5605	7147	10057	20578	1807	2334	4048	1156	634	1156	1129	385	15431	617	916	204	1400	332	2069	1235	808	3141	1353	1045	1388	7987	3081	326	981	141	269	16	6306	241	210	2964	2150	917	234
4	TCGA-2J-AAB9	1754	2552	552	119	1661	624	6890	295	96	6413	2250	1823	5583	1239	640	301	367	162	908	814	160	1126	101	478	110	864	2775	383	62	106	218	421	246	555	8299	3231	125	92	162	153	50	2559	307	109	395	878	557	160
5	TCGA-2J-AABA	13819	2143	2030	365	3704	2593	4046	531	1869	12927	7099	8914	25219	4908	1262	3193	165	567	2105	8059	429	3235	218	803	874	8798	1199	684	1444	256	870	1697	2640	1898	12929	7583	254	418	309	174	29	11509	59	646	1076	1605	1033	637
6	TCGA-2J-AABE	18744	15654	3875	488	5277	3348	6704	769	1711	16814	11107	9540	10649	4310	1063	6554	813	1247	2079	2578	140	1954	1265	363	162	1934	974	975	2064	1127	1166	3758	1926	3528	22613	6765	198	1238	154	235	20	6172	735	270	1819	2247	1103	1473
7	TCGA-2J-AABF	12606	6559	2398	846	5942	3238	19669	1620	2042	14579	16435	17622	53140	4812	2699	10587	2285	621	4063	5386	928	5015	583	2592	375	3243	5523	4382	1762	406	816	5337	4119	1953	31556	8288	958	1889	612	900	132	9008	1114	350	1599	2893	2898	1158
8	TCGA-2J-AABH	18370	22909	7627	1115	9706	3329	34770	1771	1311	8484	42446	11489	39677	12308	1608	8111	2608	179	9968	14041	804	3849	1232	972	2181	6850	2770	3397	1541	481	3374	2178	4997	4774	45892	11036	461	551	273	643	61	15199	693	117	2450	5379	3480	1839
9	TCGA-2J-AABI	4446	4061	947	1750	3712	2151	27357	535	2164	15888	7482	5749	3601	4697	1231	741	7490	804	1905	955	555	3017	31	1794	441	6426	662	1758	100	2437	10565	4004	4971	2493	26735	8162	997	1685	287	763	8	2922	617	224	4167	1281	368	1830
10	TCGA-2J-AABK	22375	13693	1541	1101	5776	5115	7333	1483	603	8374	15486	15570	42407	5063	1283	7699	1149	651	3762	3753	991	3829	401	1334	333	5827	4859	4668	2192	913	1454	2294	2656	3080	16732	5423	640	562	433	667	139	11790	112	184	3035	4885	2968	1240
11	TCGA-2J-AABO	7714	7990	2065	240	1501	2156	29227	339	352	7789	14676	9478	20267	2737	789	2119	86	249	1547	813	214	1627	557	509	154	1898	496	474	803	1923	1749	1036	1111	1392	14736	3557	142	689	384	224	17	7066	130	391	3418	2214	810	447
12	TCGA-2J-AABR	10253	4584	2310	207	2374	2098	4668	320	154	11816	10428	6131	18935	3869	978	2033	104	58	1594	2227	493	1727	64	936	16	2660	5011	483	825	173	388	1111	555	744	12532	5832	144	306	302	165	81	1961	626	356	871	857	735	439
13	TCGA-2J-AABT	4215	5005	853	249	2117	1018	5869	603	373	14629	4372	3709	8026	1739	756	2581	1884	64	1333	1424	354	1789	127	621	87	1626	728	842	436	147	423	1055	627	1512	9626	3507	133	333	242	182	76	3738	274	14	535	1263	2093	678
14	TCGA-2J-AABU	8403	5485	488	125	1398	1394	14531	373	107	8041	6322	5992	5883	2546	783	960	697	95	1834	1990	170	1431	54	1037	349	2184	263	548	273	389	761	513	803	1188	12186	5755	206	330	94	172	45	1328	160	145	921	910	729	254
15	TCGA-2J-AABV	943	1244	117	37	387	514	1966	80	87	2095	2565	1825	6741	914	109	897	800	56	728	291	100	466	54	48	92	178	1402	140	639	83	91	243	352	200	3179	1687	66	154	123	81	62	1981	403	3	265	354	351	95
16	TCGA-2L-AAQA	17674	24438	6620	1743	12968	10890	32136	2500	1799	15247	19259	20061	41474	8424	4886	10851	638	2243	7216	6449	973	5935	3052	2734	1127	4557	381	5410	4517	1068	4310	4107	11128	6378	34238	18108	1142	1509	198	1070	20	24626	2112	64	2950	8658	3063	1065
17	TCGA-2L-AAQE	29187	12964	3966	605	7722	5978	17482	1571	806	28004	24531	6908	23162	9976	1650	4735	488	1989	3610	6636	533	3688	192	1159	1139	3717	741	951	1074	438	1084	2572	2392	7036	18838	18879	363	280	159	401	13	11134	40	92	1276	3304	4125	640
18	TCGA-2L-AAQI	16238	8731	7542	1381	5438	6380	18271	1810	579	25389	19384	10966	58388	10745	1485	5918	17380	1335	4233	5949	606	2966	623	2020	1729	2706	4845	1020	692	1136	1430	2617	4214	5595	25513	14685	529	3505	270	367	86	7754	201	308	2260	2393	6129	382
19	TCGA-2L-AAQJ	30513	18704	3723	935	5015	9034	16772	2245	687	22037	17248	27715	31882	8060	1514	5385	1807	695	4200	7913	326	3142	1445	1164	338	4149	659	1562	1323	613	1828	3729	3436	3476	33579	14372	436	1174	145	360	10	13529	1557	53	2073	3400	4313	1916
20	TCGA-2L-AAQL	11816	7613	1362	588	2471	5454	7520	1130	1150	9079	19324	10604	15631	4337	636	5212	4173	94	3393	1752	101	1480	35	275	198	2962	1873	598	1139	154	642	1266	627	2313	21804	6493	233	649	219	372	29	25954	278	70	1932	2775	2081	410
21	TCGA-3A-A9I5	618	2768	161	55	1013	1160	1113	285	381	7317	4577	22730	13417	3949	1278	216	2674	238	1418	1500	233	1258	40	589	56	1423	6525	976	30	150	449	129	898	1454	12466	2964	630	277	125	776	18	8652	100	241	2360	1718	3043	554
22	TCGA-3A-A9I7	13924	5034	3061	495	4086	2927	15654	1028	1439	10494	7032	8533	26006	4065	1515	2783	310	69	2394	2687	508	2574	479	1195	292	3994	952	1062	1384	715	775	1515	953	1852	22555	6729	380	1359	430	374	137	14027	428	146	1542	2348	4995	797
23	TCGA-3A-A9I9	17948	5747	558	110	5940	3420	6513	545	2577	8692	9970	7792	9564	2887	1157	6145	1706	227	942	4000	796	3004	398	673	539	2335	3857	1589	2134	1008	1527	1473	1430	4412	11718	6766	245	577	444	328	95	4325	514	95	2085	1561	2429	336
24	TCGA-3A-A9IB	22126	6737	4725	652	4040	2382	21677	1301	259	19018	12482	6216	15291	6945	3399	2370	372	80	2134	3872	298	4471	447	1818	406	1331	1626	1410	2594	1708	538	1513	1593	2794	24943	7214	579	1158	318	493	50	6776	1170	220	1910	1540	586	943
25	TCGA-3A-A9IC	31596	12276	2161	438	3013	6257	5055	1344	316	10333	46537	6463	24355	3184	1585	5011	4062	380	2723	2534	357	2318	324	1904	1110	2536	792	3601	5241	1316	3276	2250	820	2402	17757	10443	778	894	298	722	84	3289	653	131	2963	2229	2259	988
26	TCGA-3A-A9IH	43876	18444	3253	847	11545	7412	13722	1503	3361	27533	26241	23062	46836	4447	2692	5866	543	877	4075	15013	498	3241	365	1877	784	8887	2431	1353	1829	956	3296	3041	6382	5841	34537	26361	387	1605	314	593	55	9347	787	629	2906	5159	1829	943
27	TCGA-3A-A9IU	26140	17260	5016	1616	4160	7304	4278	785	2392	9933	33277	9286	17717	9698	1452	2622	176	762	6124	33287	378	5028	160	1577	838	5408	1531	1464	458	941	5693	3280	1143	5464	46243	18007	666	860	136	473	88	3887	92	186	5915	4915	1131	1052
28	TCGA-3A-A9IX	11041	4452	1679	265	2169	1690	11183	363	693	9196	5686	4879	9261	2909	1217	2055	152	246	1584	1160	1302	2887	287	582	156	1778	10702	375	687	802	1215	1334	567	901	16972	7067	128	380	657	207	167	5200	118	135	2972	1662	523	659
29	TCGA-3A-A9IZ	31594	8295	1722	514	4120	12352	10500	724	131	11186	26394	14421	44166	4604	3008	3199	259	451	3085	4925	301	3591	297	2882	770	2205	906	1765	1001	1255	2093	1206	2273	2058	12147	7979	655	224	77	492	12	2152	401	101	1843	2658	3648	354
30	TCGA-3A-A9J0	12998	17592	3868	467	9033	4759	3742	671	1690	33886	24153	32106	21714	4065	2196	4978	616	516	2485	2498	177	2099	1853	1685	415	2355	620	2081	1173	1025	784	4184	1393	5685	24563	8870	297	2559	478	299	11	7494	411	1105	1726	2269	3090	523
31	TCGA-3E-AAAY	10473	8844	2131	281	2237	3094	4096	813	1582	10857	14746	14321	16281	3537	1120	4567	796	1510	2014	3906	670	1787	758	981	274	1842	3423	903	1161	449	698	1574	2228	2121	19728	6170	225	873	360	417	86	8014	918	60	1078	1624	2196	565
32	TCGA-3E-AAAZ	18682	19107	2048	1118	6211	4915	15225	1003	4087	18552	15915	12657	73545	11606	2982	10578	152	927	6779	1947	663	4712	2117	1823	1686	3325	1274	3565	855	386	1591	2414	2027	3038	34246	11651	1123	819	296	905	118	29290	180	74	1965	4426	440	1228
33	TCGA-F2-6879	62622	16341	9556	1145	14982	7609	23563	1177	3406	21544	41280	36492	93264	12632	6340	14181	2166	2766	9393	8612	1366	10735	2672	3044	1052	9235	3158	3813	3137	1321	4598	4781	10805	9923	29946	17261	1360	3251	176	930	66	8611	1759	328	5944	4420	11275	2502
34	TCGA-F2-6880	180	411	35	3	143	239	519	30	27	2234	315	257	4658	278	90	111	10	12	129	131	717	410	3	24	1	97	4702	7	34	159	326	119	32	136	4149	963	5	54	375	15	102	139	8	3	409	539	66	148
35	TCGA-F2-7273	6665	4557	1995	344	1618	1246	9916	410	204	11508	3519	4016	13114	3130	1305	1545	854	267	2573	2773	787	3715	92	884	24	3509	13766	450	756	525	1311	1027	800	583	34411	6936	278	495	1117	240	206	2956	461	412	2667	2156	1985	716
36	TCGA-F2-7276	3697	2917	989	100	1806	1055	9406	505	277	9661	2283	3349	5054	1582	1327	911	271	164	1400	1751	943	3203	174	486	43	2215	15236	270	331	265	569	851	266	236	25113	6436	100	434	710	244	231	2981	1366	94	1662	1765	1150	520
37	TCGA-F2-A44G	20475	10085	4153	644	7546	8456	12701	785	1723	14164	14885	10091	20503	10352	2686	7979	2418	665	2898	2606	464	3051	1078	2233	356	1654	684	2030	2873	267	276	2473	5435	3170	17695	6033	551	2927	194	433	19	9181	2386	767	728	1601	3663	865
38	TCGA-F2-A44H	1181	1180	647	46	555	894	2910	339	71	3034	1769	3383	6410	971	489	132	237	118	697	1034	124	887	0	350	18	242	1691	370	173	323	266	662	1655	478	9122	1237	114	86	141	183	26	2242	2273	253	441	472	114	286
39	TCGA-F2-A7TX	11950	2168	1138	808	2253	6200	21040	1973	261	19748	14844	6657	7817	4698	2861	1998	77	376	2761	12043	318	6677	8	5315	250	4208	2240	1584	383	494	462	2217	1400	2010	22657	10199	973	1006	355	854	124	5963	640	47	775	2347	1963	797
40	TCGA-F2-A8YN	49673	18985	5050	573	6135	5632	4834	1317	2185	48392	23839	16902	28173	8902	2253	6479	12920	600	3545	8220	474	3606	768	1253	244	6154	1006	1128	5224	846	739	1811	4154	4774	23050	11647	317	1917	172	348	25	2979	101	311	1759	2102	4779	1840
41	TCGA-FB-A4P5	8142	2811	595	148	2215	1193	3712	244	870	9960	6136	4117	8326	1363	780	2137	1228	295	798	1105	423	1142	164	576	295	1100	1391	427	657	342	450	708	14	982	10060	2826	262	317	460	246	24	3305	1411	31	728	537	677	296
42	TCGA-FB-A4P6	4816	5852	832	288	3149	1041	3705	268	383	9445	3145	2847	9526	2730	710	5861	501	66	1317	1740	959	1733	59	388	111	2346	5827	419	1353	296	522	1050	510	869	17297	3988	88	607	353	132	110	3032	188	24	1126	1216	1049	370
43	TCGA-FB-A545	9562	8183	4004	555	6270	2009	12375	656	845	13642	8911	4599	6240	5195	1826	2515	120	249	2052	3825	326	1930	211	4269	171	2938	544	1419	1681	863	1114	1761	1010	5056	20489	4495	398	2041	191	308	44	5365	224	131	1906	1577	1771	485
44	TCGA-FB-A5VM	5324	3365	1653	592	1128	2246	7174	420	1902	25626	22950	4300	7918	4586	1461	350	3958	438	1782	6690	163	2354	179	1352	2003	1713	454	1231	1046	431	908	1455	23	2761	11249	9018	323	536	287	1381	18	4880	931	166	925	1836	113	433
45	TCGA-FB-A78T	18520	27343	2618	1209	17790	7519	7543	2161	578	7542	23152	20468	48038	11592	1267	15415	238	1033	6673	4367	1428	5731	213	860	453	6110	3277	3582	1094	570	1075	5538	5664	5123	29848	9095	438	1490	658	426	108	13890	712	326	2383	4447	1722	2184
46	TCGA-FB-AAPP	11204	19251	4605	639	3822	4268	4062	1753	23	25704	19469	17617	187763	7994	2186	13211	14	442	2620	2237	257	1088	253	2066	35	2744	28	1798	8109	221	282	667	36	4536	16419	5175	896	3028	20	566	3	5713	64	1	463	1338	2769	881
47	TCGA-FB-AAPQ	5894	18350	2748	650	2405	8250	9418	1547	68	16418	4432	16112	31692	4084	953	4843	237	634	4306	3512	191	1473	1167	608	127	3324	486	2569	382	1139	1600	513	1664	3429	12475	7845	198	1205	80	203	14	3644	483	253	4455	3796	3148	1866
48	TCGA-FB-AAPS	3759	1755	1030	92	815	824	1591	247	408	5509	2783	1934	1571	701	430	1239	353	135	841	638	386	1312	113	488	68	645	1916	520	191	67	211	579	212	636	11798	2252	102	132	557	170	30	1171	132	10	272	481	341	253
49	TCGA-FB-AAPU	32893	33756	2857	2685	11253	23116	15307	4999	595	19726	39312	22016	153238	10497	2443	10583	8301	1706	18390	16241	402	5363	723	2348	163	15252	219	9887	1603	928	2004	9978	12105	4849	35693	28146	882	3004	129	1160	15	18202	363	208	3536	12993	9269	3079
50	TCGA-FB-AAPY	17882	11052	1587	658	4618	2449	33542	585	834	15982	44299	17664	35242	5234	519	7759	7779	456	2260	5340	580	1634	566	458	338	2196	1787	637	670	886	1003	2646	1637	2386	14746	4705	178	1496	420	248	42	3697	549	148	1326	1391	3342	1102
51	TCGA-FB-AAPZ	10789	11328	4126	671	2897	2357	14049	620	591	12788	7140	7575	20262	6641	1062	2996	90	434	2244	3056	454	2240	56	1075	348	2141	1456	837	557	439	997	905	332	2706	13816	8437	323	644	171	211	58	7445	4040	211	1848	2026	1832	437
52	TCGA-FB-AAQ0	16009	12359	2369	905	13007	6352	8132	1922	1952	13165	23741	16961	48285	5574	1458	9164	3063	1263	5819	5924	246	3804	311	810	469	1945	222	2791	1559	576	2652	5083	4203	6574	19305	5982	423	1252	89	369	16	15711	313	13	2665	3439	5033	1097
53	TCGA-FB-AAQ1	17135	4446	471	470	3114	2250	17607	1276	1691	42789	10960	16987	6785	5309	1984	2736	1675	63	2252	1481	552	1990	5	4495	58	2238	4669	2479	2101	2278	1220	1442	1124	3131	20695	4657	819	287	190	559	97	6825	418	297	4079	1464	625	303
54	TCGA-FB-AAQ2	31611	9428	635	684	4985	2906	59539	1591	2495	24863	24617	14687	7629	7750	3768	2263	3409	722	2829	2664	320	2979	56	5197	2128	5345	248	2376	319	1083	1425	841	2860	5755	31217	15700	1254	176	182	951	23	16491	712	143	3918	2125	684	382
55	TCGA-FB-AAQ3	19706	6425	2024	494	3452	3960	8216	328	760	5548	31587	18326	14615	4605	1211	4179	1408	288	2967	2103	148	2351	332	563	744	1640	612	552	1371	1239	784	1367	719	1998	10994	3680	408	621	91	628	41	6870	192	74	4699	1188	1732	672
56	TCGA-FB-AAQ6	6324	8035	1949	501	2028	4376	4427	817	1137	7211	9389	9100	18203	5608	803	4746	691	328	2585	2185	43	1310	95	529	42	1175	285	976	2667	764	597	2208	4838	2951	14708	5505	306	810	57	307	5	6531	113	79	1212	1644	1026	624
57	TCGA-H6-8124	11212	9013	1893	697	5496	4489	86307	2439	648	15513	31664	7737	50234	5211	2209	2921	1555	206	6401	5365	589	4590	312	2696	471	2993	3115	1185	1011	1622	2286	2586	1767	1942	31762	16653	618	1197	335	494	23	2988	299	349	4414	2133	1608	599
58	TCGA-H6-A45N	8152	5279	1740	380	2735	1771	7040	378	433	6090	6112	5969	8112	2442	755	1738	558	204	1621	3505	330	1783	134	476	76	1580	2913	915	849	234	509	849	14	1435	14525	3518	225	579	431	191	46	4799	601	41	1325	1627	1939	343
59	TCGA-H8-A6C1	8690	7175	904	524	5009	3164	17828	660	2352	9481	13911	10702	43542	3692	2208	9417	5795	1844	5348	2818	456	3406	997	1425	349	957	1457	2831	1708	1214	2022	2656	1109	2350	20435	6105	546	1969	220	568	107	5002	1182	94	1633	2169	2599	9504
60	TCGA-HV-A5A3	24491	12816	3860	1353	5395	3311	12381	844	725	4421	17801	6799	15213	8009	717	6192	730	463	4466	6146	210	3742	40	482	380	3429	656	1091	2264	312	1046	1306	1779	4797	21071	10601	295	831	518	189	47	4816	227	240	1031	2826	1191	828
61	TCGA-HV-A5A4	19696	12525	1048	299	8052	3526	4825	2031	1187	15140	13299	6172	22314	4419	1152	10223	2377	844	4528	3358	339	2126	53	867	108	5138	800	2192	1253	357	614	3089	1706	2509	23121	7698	290	624	275	339	22	10256	218	157	1001	3575	3161	1140
62	TCGA-HV-A5A5	7348	6089	1276	298	1818	2075	11329	715	404	6016	12572	9676	12149	3038	1022	2904	5805	69	1138	3453	457	1493	75	563	96	2636	4586	577	1142	731	1412	873	1294	1120	13540	5373	170	833	280	287	110	7387	61	261	2966	1427	2331	425
63	TCGA-HV-A5A6	18907	5201	3908	466	3866	4406	10584	1557	1496	28531	33235	9593	31989	4842	2643	3964	532	243	3416	4718	241	3100	321	3138	343	1821	351	1530	16439	487	1304	3383	1896	1216	19610	5167	695	1656	96	505	205	4887	1468	221	960	2075	1476	723
64	TCGA-HV-A7OL	37914	14725	2373	918	6542	4630	4030	846	1749	12317	74564	16258	34038	5756	957	7607	1798	454	2382	4831	111	1505	343	621	2378	3520	166	1082	3129	563	1112	732	7495	3391	10855	12039	351	814	229	672	3	14098	463	168	1302	3124	3108	339
65	TCGA-HV-A7OP	1762	11846	933	83	2346	1927	239	117	1218	14671	40988	17188	35460	5529	468	2964	3532	275	1328	3674	30	1227	1153	79	608	970	22	696	573	708	715	176	2	1645	7395	2035	341	743	388	589	12	14330	21	6	2506	845	2471	121
66	TCGA-HV-AA8V	18235	8999	1156	351	4402	2154	6428	762	468	8578	11195	5578	21389	3539	799	3019	858	374	1720	4478	687	1836	254	803	297	4038	3971	1247	642	472	1321	1384	1650	975	18620	6620	192	1286	289	244	127	4103	1010	312	1952	1602	2013	459
67	TCGA-HV-AA8X	25126	27505	5255	756	3748	6759	11331	1575	1423	31301	26017	42934	53773	6531	2570	6985	1109	216	8598	5538	291	3144	1069	1951	589	8088	518	2573	3720	2154	1920	4815	5274	3480	32707	19360	1043	1834	156	1018	8	10339	480	584	4785	3699	7755	2662
68	TCGA-HZ-7289	27644	10518	7967	828	4184	12117	4178	1253	501	20007	54286	14649	948523	11868	3144	11483	786	57	4529	15960	126	2059	721	1795	114	5041	61	1130	12577	295	460	1194	372	3889	19028	7796	886	4761	126	587	9	13479	363	221	1424	1827	3657	759
69	TCGA-HZ-7918	1990	1491	812	207	2090	2679	6976	295	116	13054	13688	13172	42959	1191	1961	340	230	47	1863	2809	495	4039	185	1237	25	1334	15318	1370	16	437	803	1116	964	1679	18237	4201	336	574	296	401	90	1851	2185	512	1468	1938	511	892
70	TCGA-HZ-7919	40676	11744	7954	793	10915	7754	35326	1909	1329	22226	22719	23649	38379	7189	4595	6986	3975	564	6436	12005	634	3909	638	2715	869	9868	2156	1780	899	1483	2459	1764	3530	3265	43230	18530	684	1249	326	556	76	12566	438	126	4809	4177	9113	857
71	TCGA-HZ-7920	5342	3098	1258	153	961	1083	16110	537	235	8433	4004	1680	8502	1329	1367	1099	603	92	2006	3984	744	2847	16	563	13	3037	5123	336	249	234	1867	681	15	175	20628	5980	136	302	591	241	174	2989	941	322	1403	1524	3589	824
72	TCGA-HZ-7922	36829	6730	6091	1044	2840	7202	23011	953	275	18891	15564	12848	29256	3979	2878	2743	5128	1135	4527	4523	414	6050	637	1178	284	1567	2387	1244	1134	1490	2339	1459	358	1956	31642	11914	550	1320	581	347	47	5315	519	602	4273	1895	8231	556
73	TCGA-HZ-7923	8168	5851	1538	489	2493	1096	5424	473	466	11334	4058	6583	13107	3336	946	4268	5235	128	1811	2777	1632	3666	78	535	12	4068	8069	521	796	240	557	1248	137	603	17934	6215	169	909	829	227	216	3035	748	116	1344	1643	2520	790
74	TCGA-HZ-7924	32549	17860	7533	1117	9365	7035	15378	1291	694	22485	19925	32221	177865	12721	4586	18661	366	96	5378	7097	1062	8093	2533	2882	59	14062	1935	2544	5904	707	847	5255	57	4128	44768	11600	1114	4859	407	708	131	23066	182	81	2814	2718	11077	1812
75	TCGA-HZ-7925	25871	7204	2550	631	2824	5670	18670	2696	2588	19937	12806	21382	20297	5350	3593	2465	1341	74	5319	8379	309	3699	109	1821	161	8149	3749	2748	1292	2858	4715	2702	1365	2501	34641	13318	1068	617	1134	1031	16	8657	224	1066	5574	3717	2921	649
76	TCGA-HZ-7926	10801	22123	8923	1270	11748	6911	42198	1932	466	19368	9315	22493	57803	13058	3804	6948	289	428	9877	9523	1140	6893	261	2602	221	10902	1993	1212	1769	1289	1129	3209	3284	1984	62693	15329	541	2027	368	428	136	15435	847	195	4018	5011	11762	1544
77	TCGA-HZ-8001	18393	6068	2946	269	2745	1588	4013	763	1417	18923	31732	6016	24110	3263	849	2124	3929	270	1849	8296	293	1686	179	910	671	2079	2978	547	480	505	1116	923	2455	2372	25275	9166	332	590	498	512	66	4620	181	179	2100	1930	1145	538
78	TCGA-HZ-8002	3390	3784	1545	355	1888	1079	13690	359	139	7897	2131	5211	7416	2961	1506	1644	68	256	1198	1358	1532	3450	149	1640	184	2480	16955	428	590	735	612	1128	66	522	25743	4891	241	387	805	277	234	1514	368	119	2225	1494	1178	545
79	TCGA-HZ-8003	1860	1773	2215	371	942	830	9285	425	271	7378	6702	2676	3634	1427	1302	724	1177	168	1217	3107	1042	2109	155	1019	132	1294	4894	613	146	155	676	398	1018	498	12395	3116	255	579	967	231	227	1465	298	399	756	1184	878	494
80	TCGA-HZ-8005	10447	8868	3990	178	3877	2645	72173	1383	503	30668	6348	7003	4175	8713	4320	39	51	315	1355	572	363	3642	77	6671	68	1826	628	1519	725	1377	669	2907	5920	5803	23679	8200	537	1416	334	362	59	10465	912	488	5543	1289	385	928
81	TCGA-HZ-8315	30434	10888	4086	1490	5549	4352	14608	1766	1536	19813	17454	12674	27063	7132	1696	3325	617	1647	3262	8560	1228	5282	161	1120	1907	7952	3768	826	617	919	2256	2387	197	2627	24546	8807	294	2034	321	301	137	5002	227	195	2745	4668	4026	828
82	TCGA-HZ-8317	9502	6974	2027	412	3655	2635	18347	560	700	9925	8114	7605	65112	3560	2524	4621	1987	226	1914	3431	1089	2620	430	1604	162	3054	5163	1351	1821	521	837	1638	792	1447	20838	5107	355	1344	477	379	156	3931	634	193	1842	1889	1957	578
83	TCGA-HZ-8519	5837	3327	457	651	2178	3468	5181	1181	896	19087	8001	7040	4653	1866	2165	3396	1026	494	4500	8697	1533	4051	42	1230	71	8261	3831	2280	92	350	4866	1576	7409	2222	27661	13069	772	1578	1043	726	295	6612	810	511	1552	2628	3579	1213
84	TCGA-HZ-8636	25401	18037	8355	514	9672	5052	29134	940	283	25784	19614	13149	47779	5603	4146	5190	1372	647	6461	4190	524	6155	1337	2337	383	6571	2324	2501	1291	2035	3984	4970	2230	3001	47648	14222	584	1338	835	494	29	4910	1814	866	5492	4404	2830	1753
85	TCGA-HZ-8637	4830	3400	417	1391	2506	4032	9134	342	1255	10518	7520	10254	8856	2142	4264	2267	950	329	2958	5026	1492	2440	139	2240	43	2038	2138	2117	498	515	996	1240	12210	6254	21001	3892	1729	417	841	1444	49	2713	7098	255	2072	1558	6841	1493
86	TCGA-HZ-A49G	10776	4973	1270	452	5105	1781	9228	611	472	8806	9314	4533	11320	2453	1216	3902	163	220	1261	3139	929	2244	142	561	272	1423	3740	980	977	313	327	752	862	2109	14629	4112	144	987	699	205	129	3194	3849	152	823	1453	1515	285
87	TCGA-HZ-A49H	8886	8008	625	251	2413	1880	3738	343	215	8173	7856	9224	34736	1919	714	4834	3453	85	2182	1265	435	2170	691	403	200	1964	3420	327	1594	213	409	1572	587	1079	11596	3551	144	332	506	241	59	2956	427	22	994	807	535	766
88	TCGA-HZ-A49I	13214	17577	3559	281	7115	2061	19022	1218	948	19664	16232	14024	35905	6814	1405	6446	217	512	3079	2411	464	2737	217	426	548	4809	1652	441	2609	314	2185	1539	882	3898	24662	11248	91	1013	341	237	22	10570	1798	61	3453	2488	877	531
89	TCGA-HZ-A4BH	15242	10126	8153	206	5907	4702	26429	1845	1639	14291	10015	14014	16292	8060	3883	5841	1482	536	4517	4939	645	2755	817	1477	1458	2559	1208	1868	2677	843	1661	2366	551	1595	24273	8814	551	1162	413	389	37	5692	538	233	4397	2653	2413	512
90	TCGA-HZ-A4BK	16176	15783	4280	623	5788	2193	8358	893	528	16631	13161	18691	29536	7344	1063	7073	1694	469	2428	3995	730	2522	486	750	103	5578	3561	1378	1582	802	1698	1776	1510	3472	21854	9805	321	3562	247	336	46	12103	521	113	2482	1890	3678	864
91	TCGA-HZ-A77O	5409	8088	1673	429	5800	2527	36453	1408	775	9292	14743	5093	27928	6550	1810	3049	990	63	1771	1054	223	2061	320	2195	347	1503	3607	1521	1292	1313	1220	1648	2127	3061	21986	12249	762	669	203	674	72	17149	1000	215	2026	1433	549	271
92	TCGA-HZ-A77P	8932	7258	2406	472	2231	2409	4592	702	316	34322	6934	10023	27412	3642	1403	5473	845	377	1551	2595	728	2219	451	1168	641	3294	3054	885	2579	763	1610	837	80	2353	17220	6432	283	3375	502	402	102	5462	492	240	2243	1473	1117	776
93	TCGA-HZ-A77Q	13843	5959	2805	204	2121	2736	5887	508	1364	19181	8076	8099	6569	2450	1061	1381	1958	309	2259	6182	366	1671	60	522	339	2008	1395	494	814	538	1366	491	589	1519	15038	6511	157	583	531	199	30	4385	221	39	1450	1524	1998	517
94	TCGA-HZ-A8P0	5433	11512	406	381	6151	3782	7018	611	789	7012	10700	7055	54218	4116	1360	5974	263	639	2568	595	321	2518	427	656	92	2711	1557	1101	2777	466	1007	1558	2450	1232	25896	4583	261	632	145	426	24	11446	63	403	1439	1881	563	1001
95	TCGA-HZ-A8P1	16658	33677	2888	1683	5341	6186	6929	3194	728	15231	15331	28398	85380	6038	923	13295	107	2215	5564	3427	578	6244	1548	1028	125	4614	534	2909	2525	255	816	2445	21	4703	28220	7720	493	2162	94	648	8	17466	68	65	900	4503	6645	1524
96	TCGA-HZ-A9TJ	19256	14119	5091	1010	7508	4890	18459	1841	447	16277	19921	13177	53640	9735	2066	4587	1240	504	6439	4316	402	13924	236	932	145	5392	1064	1011	1451	935	1540	3436	2111	2988	20970	12104	313	512	82	321	20	12706	255	328	4078	4409	2625	886
97	TCGA-IB-7644	40525	19752	6720	1088	8037	9594	17104	1115	1339	14619	31907	29907	73578	15399	5666	11474	7943	742	9640	3427	434	9933	2557	1831	836	5654	1669	2352	6316	1827	2008	9575	6737	5654	28567	17075	899	782	329	507	70	14536	1476	35	4435	4296	8049	1534
98	TCGA-IB-7645	7709	3881	4924	376	1797	3278	23739	1174	659	8796	6505	14208	40047	2277	1426	2810	5157	163	5050	4793	424	3089	1478	940	81	2650	3502	914	293	430	589	712	2261	1249	33815	7793	258	1648	611	281	69	4127	828	613	1256	1854	2521	990
99	TCGA-IB-7646	14044	8148	7560	827	1779	3809	20073	784	1469	33674	15119	14654	29064	3622	5607	1365	355	334	3800	1905	343	2721	150	5979	517	3498	608	1584	1236	2512	3830	1935	2216	1191	28530	10847	1689	855	104	928	15	4384	597	254	3219	2433	1511	668
100	TCGA-IB-7649	6324	3160	1572	283	1419	1537	8579	369	145	6735	9953	4998	15699	2878	808	1640	642	218	2173	1733	257	2344	252	485	190	1689	3613	317	479	177	199	1047	745	506	10467	4061	113	457	216	101	90	1874	883	54	630	696	1844	205
101	TCGA-IB-7651	16747	11742	4202	374	6899	7746	18265	1141	1741	58655	17041	19256	10028	7763	3877	3217	6074	376	6725	5127	824	3673	203	2299	22	5317	2352	1489	158	1217	1789	2992	4447	3537	28425	22236	753	944	241	886	94	16143	22214	15	6944	2789	8108	1164
102	TCGA-IB-7652	16692	31708	8194	1152	5486	9608	28681	1155	1811	17441	15022	28401	97443	10575	7168	9448	250	944	4220	4395	893	5172	2973	2243	659	8473	8520	883	2883	1386	6358	4855	1655	1954	38858	24405	503	1169	462	462	125	8014	750	1450	7056	4624	3327	2025
103	TCGA-IB-7654	21231	12534	800	1077	8129	7868	24160	3274	294	32067	8945	20351	30310	12331	2067	9794	83	191	6379	2690	726	3769	2856	951	110	9742	3401	617	9	535	1584	642	5508	2776	34127	34414	230	1188	480	227	133	16243	485	253	3882	4577	5945	2556
104	TCGA-IB-7885	23276	6942	1772	1539	4553	4243	46678	890	418	13541	11173	27338	23302	6076	2906	4113	5886	338	4138	1092	475	3694	748	3091	136	10917	1818	2250	774	2124	1903	1823	3603	2792	41370	14375	742	304	442	892	34	6014	3051	528	3391	3236	7648	1330
105	TCGA-IB-7886	27573	13214	10699	710	3748	8138	41993	2273	906	46554	30557	22255	64940	8412	2132	4511	746	989	3778	13036	588	4656	191	2012	342	6314	1398	1458	1911	496	3714	1969	2314	5388	32833	14938	410	4043	536	473	39	14759	429	6	2503	7354	13687	695
106	TCGA-IB-7887	29652	10870	1089	762	2585	5163	23837	625	308	11223	19787	26605	94812	13367	4606	12380	1622	156	5911	3098	352	6527	286	1424	133	8038	753	896	3753	3147	1751	1805	2664	3523	26456	19205	489	893	318	423	30	5368	389	659	4876	1729	4646	1451
107	TCGA-IB-7888	8647	4756	3116	490	1674	2778	6364	398	339	9900	8660	10770	41751	1933	1206	2646	333	72	3750	1408	357	3530	1487	641	179	4177	3746	383	444	617	556	2382	1188	446	14976	7747	160	1184	270	226	48	3090	225	6	1761	2133	1588	851
108	TCGA-IB-7889	17254	10064	3378	1110	4192	5593	12491	1437	1210	16131	22176	10865	52016	5463	1124	2505	469	797	3670	2505	229	2517	185	1012	1062	2426	4052	515	751	485	1137	1211	778	2318	35219	9742	357	986	231	445	178	9985	1235	87	2629	4517	1114	772
109	TCGA-IB-7890	4877	5932	4889	280	2897	1463	40254	1460	355	8049	5372	5786	5336	4258	2362	1074	158	368	2345	1770	383	3741	424	2239	583	3289	2212	666	182	266	1125	994	1298	1912	21736	14528	417	10	527	231	17	6159	887	117	1381	2185	967	704
110	TCGA-IB-7891	6329	5269	2594	361	2020	2099	10893	358	294	8566	9862	7550	16663	2095	2165	1355	625	762	2774	3583	498	3318	967	984	122	2666	7514	713	646	667	1418	1757	1163	694	20924	7668	267	275	330	309	113	3858	835	209	2998	2372	1382	707
111	TCGA-IB-7893	8885	3305	5097	219	4689	1767	21524	889	229	15531	37543	10307	3887	3882	4734	307	556	967	2630	4124	457	7383	220	6427	556	2065	2692	1197	325	374	593	1132	2160	1162	34216	9620	1203	574	441	935	130	3783	281	393	938	3732	900	657
112	TCGA-IB-7897	2341	2154	557	243	1270	990	6485	523	228	6702	3055	4469	4209	1506	2203	925	248	115	1211	1345	1074	3442	310	1251	96	2019	5261	606	120	235	912	467	948	478	20108	6366	297	274	1191	237	130	1344	169	107	878	1103	350	1044
113	TCGA-IB-8126	1181	1489	422	105	529	925	8908	225	24	4549	2181	2203	4491	814	574	739	123	85	792	672	993	1606	114	249	62	548	6265	236	286	205	483	451	309	372	7630	2187	73	147	504	103	147	913	152	41	1115	907	313	292
114	TCGA-IB-8127	39383	20378	8480	1953	8072	9244	63864	3441	1398	49148	16256	29967	25429	8236	3614	6746	1584	2815	4474	9022	983	6901	758	2007	503	8021	2496	2072	2232	2660	4494	5995	3615	7455	49746	20561	816	2676	449	755	83	17149	627	154	8366	8375	8082	2102
115	TCGA-IB-A5SO	18172	14792	3711	1516	4529	5599	15818	2472	811	15137	18149	12316	46180	7350	1719	10516	301	702	7077	3864	728	3291	327	920	281	7412	2809	1523	2722	949	1678	1856	531	2267	27976	13734	304	1249	592	337	69	8727	831	471	4427	2610	4012	748
116	TCGA-IB-A5SP	38945	25327	4957	611	6772	5629	8953	1101	3207	30438	34663	31244	91648	9970	1367	6918	2990	40	4883	7078	84	2382	3380	868	1901	9128	688	490	1725	974	845	2409	2927	6023	23347	18996	276	3915	961	399	20	18897	698	24	1515	2205	8359	1286
117	TCGA-IB-A5SQ	12653	2070	484	311	2202	1830	8181	572	385	27474	6293	6285	5777	3829	1634	243	203	372	1553	2380	295	1787	234	2614	266	2371	686	1832	152	715	1845	831	853	804	19997	10090	431	825	788	423	39	5073	4670	307	2501	2081	1115	491
118	TCGA-IB-A5SS	17887	11066	4873	822	4392	3294	20055	1149	1209	33291	39005	15643	15952	11961	2045	2476	588	211	2804	1539	177	3437	196	3482	1407	5871	1225	1678	1490	826	884	3271	6066	2650	38356	19232	671	418	452	682	12	5618	3865	93	1209	4073	987	967
119	TCGA-IB-A5ST	11588	2378	784	195	1421	2600	16363	809	425	18180	10227	11507	11359	1137	1747	3131	4160	88	1614	4700	510	2320	256	618	108	1737	1967	1274	1614	587	917	1836	1715	862	18029	7183	491	1524	807	620	85	2893	332	60	2098	1856	3454	551
120	TCGA-IB-A6UF	13714	13476	1668	347	5927	5163	8951	640	661	12934	10895	7700	11506	3835	1125	1877	860	762	4649	5601	368	3338	59	1490	1035	2454	2413	1743	388	1965	11023	1849	2555	4988	54086	12400	711	354	216	599	88	3175	118	21	4180	2191	1279	719
121	TCGA-IB-A6UG	5798	9580	712	231	4231	2464	6954	319	1982	12696	3172	2497	6958	1956	1202	1567	224	1004	2506	1201	685	3201	46	1361	103	1138	3919	1255	852	839	1978	3147	2209	1888	21515	4864	380	770	423	299	145	6758	210	28	2660	3872	813	620
122	TCGA-IB-A7LX	8637	13659	2291	1937	8931	5053	38216	1347	1898	39768	9595	8019	10278	11302	2219	3011	829	763	2463	4931	924	5388	35	4453	444	2825	2365	4141	2216	2001	4074	2910	700	7105	34534	11051	952	656	103	479	37	7533	124	149	5894	5131	1026	771
123	TCGA-IB-A7M4	16707	5862	10336	649	6296	2629	13212	1962	546	16352	30288	6066	36497	7774	2196	3462	1847	412	2127	10276	119	3176	454	1280	2835	4007	830	1075	2458	1987	1335	4520	119	7958	13649	9760	540	1421	133	499	49	7978	514	363	2132	1722	3576	531
124	TCGA-IB-AAUM	4297	3813	417	202	1891	1126	2153	219	410	5940	4030	3461	13343	1390	445	2864	978	159	1262	883	962	1365	191	217	58	990	4626	414	602	258	522	1238	409	661	11451	2450	68	601	532	119	161	1050	295	40	998	1247	377	793
125	TCGA-IB-AAUN	5981	11734	2177	436	4817	6224	18244	1261	1501	11330	8939	7825	14520	6970	2377	2002	163	322	3743	3741	504	2248	143	3096	1205	3467	1819	2059	1803	686	2894	2423	2337	2717	28087	12467	818	846	331	627	57	9380	556	119	2692	2309	679	731
126	TCGA-IB-AAUO	24557	5281	683	661	6961	2891	14871	1091	4429	21308	27848	13680	10120	6799	5456	3199	6790	535	2922	2172	898	4927	61	1361	339	2428	609	2940	982	2460	3599	1189	2691	4520	14897	9865	495	572	362	624	60	13806	178	193	3307	3316	1304	628
127	TCGA-IB-AAUP	11530	2650	2573	301	2786	2162	8169	1176	462	9699	26144	6168	18691	3409	2156	1888	1586	230	975	1752	1045	3179	158	879	285	3457	3114	786	480	754	693	1006	580	1236	13564	5297	373	663	854	341	104	3551	409	327	1864	1311	1674	439
128	TCGA-IB-AAUQ	15003	8906	2572	131	2933	1269	11397	546	459	17838	5109	2956	14809	4443	1539	1967	8526	202	1436	2879	300	1774	201	1361	170	2083	1949	794	1298	612	638	861	1116	1824	11332	3862	198	212	439	254	38	2964	233	342	1959	1175	1867	257
129	TCGA-IB-AAUR	9118	4980	975	211	2282	1572	2316	301	645	9051	5264	3845	7002	998	706	2002	202	264	877	1253	1486	1568	112	270	59	1382	2010	473	820	116	430	1052	345	837	15902	4565	109	354	900	223	88	2483	249	76	536	1643	176	609
130	TCGA-IB-AAUS	5173	2638	1425	163	1107	1830	10161	315	742	6918	3144	5211	5061	2435	1121	1252	1386	102	1441	1518	538	1626	145	738	106	1454	1613	898	1060	326	551	518	690	837	15388	4035	286	658	534	305	20	2091	2084	144	795	585	661	465
131	TCGA-IB-AAUU	23599	20384	4307	1217	7061	9267	12147	2126	680	24526	36485	23241	45113	10077	1786	9913	1985	900	4648	5996	456	3761	986	1185	290	5480	1790	1741	1685	806	1338	2095	4314	5051	29920	11439	575	1726	408	533	197	8525	1184	150	2737	4708	6437	1256
132	TCGA-IB-AAUV	348	726	1064	51	323	430	1680	129	120	5510	306	1086	319	301	515	45	278	68	795	411	743	2278	21	320	11	958	5230	178	19	86	399	260	30	91	21764	2728	78	88	859	152	88	629	1004	21	488	549	348	1127
133	TCGA-IB-AAUW	12350	8992	2379	413	3738	1866	6347	697	422	9955	7575	10277	33421	5190	798	5723	387	88	2382	1957	1035	4635	560	337	105	4378	13024	313	854	529	756	1963	452	1127	21964	6857	84	1098	976	167	138	4832	317	202	2921	1480	1765	982
134	TCGA-L1-A7W4	23263	4483	202	1163	2520	1409	4978	1113	844	49759	7019	7547	2265	4409	3933	42	1230	553	2379	2068	717	6976	5	5230	24	1774	1463	3178	181	2416	4276	1002	91	9856	30075	17087	1658	488	384	1464	3	547	20	602	4616	1796	675	428
135	TCGA-LB-A7SX	7633	8239	294	393	4021	4039	8084	831	4641	28299	23433	14683	14165	2080	3007	7147	13035	2087	2481	5289	495	4768	956	2088	415	3465	556	2566	2297	509	4376	6607	1260	2934	22556	5142	950	977	683	819	25	5743	103	448	1164	2109	4076	991
136	TCGA-LB-A8F3	425	4715	542	41	2206	2855	7323	1583	266	43458	15955	17199	66348	6328	484	4	335	139	3508	2796	183	753	3	415	11	771	2863	741	36	269	305	1346	1979	1244	22229	8514	491	2355	204	848	56	2408	325	14	1253	3142	1796	870
137	TCGA-LB-A9Q5	6904	3074	2371	191	2285	1319	11005	197	438	7186	3692	3319	7951	2013	725	768	1113	41	1265	2164	219	795	336	666	342	514	3401	352	521	657	831	689	1323	1060	16121	4164	159	445	380	195	63	3215	296	46	1909	915	399	287
138	TCGA-M8-A5N4	18705	12229	2722	466	9639	1696	19538	1559	1101	10597	18291	11394	8996	6678	2241	4259	1337	867	4859	3467	511	3680	214	1299	167	2832	245	2324	1525	414	667	1532	1209	3379	31983	13033	408	654	271	290	41	8564	662	7	682	2234	2704	1034
139	TCGA-OE-A75W	17391	21434	2825	825	8540	7627	4684	1190	1282	27860	35867	19427	35891	10027	745	14803	693	276	2093	3149	199	1814	492	610	352	2918	1091	1678	3690	4012	4892	1839	3175	6619	16389	12804	346	1061	270	1016	3	21635	160	29	9214	3896	2616	428
140	TCGA-PZ-A5RE	52634	15873	4919	1527	8834	8465	7464	971	2022	23862	46146	25467	80119	12599	1712	9989	3269	407	4540	8089	302	2598	437	1064	972	5846	655	991	2785	1476	3378	1575	1641	5134	29254	14898	408	1866	364	272	18	19790	957	157	3614	3872	5982	840
141	TCGA-Q3-A5QY	9327	1628	325	141	758	617	5418	192	279	6470	3992	5913	4346	1048	501	545	664	142	412	452	1041	1495	86	270	54	1611	1114	257	428	263	429	234	25	905	8392	3117	141	232	635	221	40	1971	376	25	1307	813	482	286
142	TCGA-Q3-AA2A	13463	11920	1374	699	7859	3156	2357	859	1680	7253	12524	9709	25241	4996	1052	8818	260	700	2290	2572	576	2334	392	641	260	1531	253	1492	1855	61	70	2068	2891	3003	13603	4614	184	1205	130	276	112	6566	467	47	135	1501	1078	917
143	TCGA-RB-A7B8	22928	9763	905	295	3627	2743	6079	523	990	8837	11640	13113	20335	2833	1583	7456	1262	792	2298	1489	315	2836	205	699	77	1304	549	1594	817	521	687	2342	1126	2251	21799	4468	207	754	238	414	25	6772	599	337	900	1527	1055	863
144	TCGA-RB-AA9M	9712	7840	2951	983	3268	2329	6747	773	872	9465	4307	5323	14793	5561	1862	2626	272	88	2429	2427	541	2860	50	1527	252	3164	9650	1147	1646	1144	1188	1969	1844	2040	32264	7551	730	1888	307	574	88	9191	413	368	2516	3933	1590	487
145	TCGA-RL-AAAS	4561	3748	510	180	1167	1241	3518	366	242	7364	4035	6505	8761	2473	783	2140	405	130	1086	1078	207	1220	21	349	68	1989	5909	301	815	182	363	1354	55	510	15959	2938	164	256	444	258	101	4099	1821	83	805	891	1048	307
146	TCGA-S4-A8RM	15070	34406	11818	2090	15912	10134	37342	3366	2033	28780	15856	23344	111189	14431	1823	15749	2060	1812	12451	5199	908	7555	3655	1916	574	12050	938	2051	1023	644	1260	4338	8285	5570	53226	10249	264	1187	336	422	37	14496	260	305	2630	4455	5001	4021
147	TCGA-S4-A8RO	14094	6325	15609	557	6752	8903	16071	905	843	15428	12358	13077	29724	6480	2831	7424	174	427	5296	3997	400	3328	441	3022	3022	2280	379	4212	1022	723	1105	4011	6636	3550	15410	5229	509	877	295	923	25	12312	833	157	2385	4589	1221	608
148	TCGA-S4-A8RP	18026	13981	2112	642	7556	4839	6906	918	1294	11688	8878	9334	24542	4047	1230	11572	252	339	1952	3472	643	3014	323	617	238	4002	2882	1848	1585	614	825	3049	38	3210	20448	6904	248	2040	233	306	82	7822	268	220	1521	2727	2259	1212
149	TCGA-US-A774	12743	5901	1532	543	2896	2397	9881	791	293	16433	9695	11741	21242	4162	1562	3649	3335	105	2623	2085	682	3533	259	925	170	3828	4478	946	1167	1467	1129	2439	1243	1901	22710	7549	268	1124	485	304	128	4664	936	219	3520	1811	3923	776
150	TCGA-US-A779	31540	21084	3755	902	9294	5912	9222	1263	2693	15404	27511	19411	48391	6923	884	12375	1349	390	3193	2289	226	2605	1124	507	807	3827	1255	948	2127	1247	1381	4569	3724	5970	17488	6526	221	1591	252	416	27	18307	200	143	2388	3205	2195	1125
151	TCGA-US-A77E	22448	13333	2632	1104	6459	5328	11046	1010	2418	44186	16100	9637	22050	7437	1710	5692	4651	356	3587	6407	590	3332	193	1363	357	5641	1218	1511	1424	143	928	4017	23	5954	20385	9501	323	1361	201	416	43	10606	821	47	561	2865	4688	784
152	TCGA-US-A77G	32817	24611	6439	1477	14713	9256	26008	845	2166	14939	32317	27628	48849	11988	2647	15757	496	383	14461	2791	736	5684	2248	1377	1562	6634	1553	2582	1153	1199	1732	3861	5639	4574	33511	20738	470	1346	317	531	57	7537	366	261	2949	4231	3894	2336
153	TCGA-US-A77J	2096	2712	402	171	1142	498	2218	176	249	4811	2326	2217	7459	1861	373	1442	620	67	1019	774	278	827	15	283	8	1602	3673	196	313	157	262	222	17	318	11902	2164	124	250	392	263	49	3166	1477	90	784	561	515	277
154	TCGA-XD-AAUG	1611	2977	597	82	928	610	1955	190	208	4790	2651	2648	9152	1034	283	1541	499	89	761	790	388	1595	145	180	43	817	1468	123	700	126	347	433	277	480	12345	1764	27	327	261	72	32	1242	102	15	320	517	295	669
155	TCGA-XD-AAUH	4338	5296	902	234	1685	1295	4930	468	533	6075	4498	3760	6778	1196	608	2092	521	339	1612	1176	555	3110	282	228	114	1999	1630	342	284	366	1065	835	334	777	12896	5191	79	303	513	175	58	2844	48	52	1078	1887	781	433
156	TCGA-XD-AAUI	6015	9620	2662	674	2962	3403	13682	765	403	11266	11420	13164	14190	5336	1268	2215	1539	645	2045	1623	436	2201	812	1462	650	3161	1239	1925	546	453	839	1329	1137	2748	18704	6441	436	885	328	532	52	6128	1108	180	2308	3071	3816	852
157	TCGA-XD-AAUL	32274	13348	4543	1038	5706	4740	8978	869	4501	12824	26623	14199	48461	9569	2386	7602	295	123	2120	2212	422	2434	454	1452	668	3554	1523	1180	2567	249	459	3041	1162	3894	41073	11007	395	1580	286	346	57	9878	1450	239	844	1738	2832	1305
158	TCGA-XN-A8T3	6454	7054	1435	357	2499	691	10559	358	104	6793	2098	3520	3763	1711	1089	1776	16	260	1013	1909	689	2134	16	1864	364	2273	3541	2052	1127	379	1563	1552	1411	616	19854	5107	717	454	485	461	81	1703	360	96	965	1001	150	457
159	TCGA-XN-A8T5	7355	4391	1680	269	1259	1608	2813	376	971	8750	2481	5823	11505	2363	962	1989	17	113	1055	440	555	1400	184	578	85	2046	1782	214	1026	745	553	1048	1246	522	14223	6325	110	1629	448	129	65	5703	28	89	2494	916	892	547
160	TCGA-YB-A89D	14775	10810	3412	779	3722	4191	13316	894	810	8291	14977	13339	25521	5526	1116	4848	3218	205	3635	3265	453	2351	515	650	218	2934	1591	513	1464	648	1677	1628	1061	3811	15088	7072	128	1220	300	202	36	9001	3197	87	1903	3387	4005	569
161	TCGA-YH-A8SY	10332	5290	2570	1287	3416	3264	22355	709	2380	7158	12157	9078	22427	4893	1253	3247	7157	1264	2488	1534	426	3204	1137	1625	775	1850	585	1985	1093	779	1816	2548	2176	2033	17759	5482	578	655	727	532	5	3259	246	246	2307	2167	1540	1071
162	TCGA-YY-A8LH	29550	18463	4421	1227	10285	12084	20254	1817	2475	81002	29673	24009	80228	11001	1708	17001	2334	2088	7457	5691	263	3213	375	1641	754	3222	245	1972	1881	686	1054	5965	6443	8560	25762	13860	552	2161	108	583	9	23867	363	12	1103	4574	7034	1482
163	TCGA-Z5-AAPL	4983	1554	529	348	965	1761	1398	288	209	3463	7048	4801	5998	1651	904	2198	703	253	924	1217	1512	1596	43	681	59	959	859	643	288	230	485	246	72	1158	9102	2007	337	393	411	403	162	2455	413	29	689	502	1252	192
[truncated: 202 more columns]
