# Supplementary material for: A two-gene-based prognostic signature for pancreatic cancer
Source: Aging (Albany NY). 2020 Sep 23;12(18):18322–42. doi: 10.18632/aging.103698 (PMC7585105; doi:10.18632/aging.103698)
Supplement: Supplementary Table 6 [file aging-12-103698-s006..xlsx]

## Sheet: Supplementary Table 6. The expr
	Type	Gene	Expression
1	Tumor	HIST1H1C	4.59351
2	Normal	HIST1H1C	4.20381
3	Tumor	HIST1H1C	5.38305
4	Normal	HIST1H1C	4.31126
5	Tumor	HIST1H1C	4.64269
6	Normal	HIST1H1C	4.24794
7	Tumor	HIST1H1C	3.70726
8	Normal	HIST1H1C	3.99764
9	Tumor	HIST1H1C	5.91219
10	Normal	HIST1H1C	3.64661
11	Tumor	HIST1H1C	4.62938
12	Normal	HIST1H1C	4.09911
13	Tumor	HIST1H1C	4.82884
14	Normal	HIST1H1C	4.08878
15	Tumor	HIST1H1C	4.88944
16	Normal	HIST1H1C	4.15402
17	Tumor	HIST1H1C	5.47875
18	Normal	HIST1H1C	4.26693
19	Tumor	HIST1H1C	4.80885
20	Normal	HIST1H1C	4.87769
21	Tumor	HIST1H1C	4.51593
22	Normal	HIST1H1C	4.25254
23	Tumor	HIST1H1C	4.71871
24	Normal	HIST1H1C	3.98223
25	Tumor	HIST1H1C	4.0442
26	Normal	HIST1H1C	4.3897
27	Tumor	HIST1H1C	4.3803
28	Normal	HIST1H1C	4.59144
29	Tumor	HIST1H1C	4.1339
30	Normal	HIST1H1C	4.44575
31	Tumor	HIST1H1C	4.48248
32	Normal	HIST1H1C	4.77127
33	Tumor	HIST1H1C	4.70986
34	Normal	HIST1H1C	4.50924
35	Tumor	HIST1H1C	4.47268
36	Normal	HIST1H1C	3.97066
37	Tumor	HIST1H1C	5.04128
38	Normal	HIST1H1C	4.11561
39	Tumor	HIST1H1C	4.77368
40	Normal	HIST1H1C	4.25254
41	Tumor	HIST1H1C	4.52371
42	Normal	HIST1H1C	4.78368
43	Tumor	HIST1H1C	3.95196
44	Normal	HIST1H1C	4.198
45	Tumor	HIST1H1C	4.34825
46	Normal	HIST1H1C	4.33668
47	Tumor	HIST1H1C	4.44124
48	Normal	HIST1H1C	4.19998
49	Tumor	HIST1H1C	5.28475
50	Normal	HIST1H1C	3.72781
51	Tumor	HIST1H1C	4.41578
52	Normal	HIST1H1C	4.17709
53	Tumor	HIST1H1C	5.06986
54	Normal	HIST1H1C	5.45599
55	Tumor	HIST1H1C	5.33892
56	Normal	HIST1H1C	3.68452
57	Tumor	HIST1H1C	4.75965
58	Normal	HIST1H1C	3.46581
59	Tumor	HIST1H1C	4.69249
60	Normal	HIST1H1C	4.74937
61	Tumor	HIST1H1C	4.87009
62	Normal	HIST1H1C	4.1082
63	Tumor	HIST1H1C	5.50064
64	Normal	HIST1H1C	5.21445
65	Tumor	HIST1H1C	4.71547
66	Normal	HIST1H1C	4.70273
67	Tumor	HIST1H1C	5.05652
68	Normal	HIST1H1C	4.21856
69	Tumor	HIST1H1C	5.39393
70	Normal	HIST1H1C	4.61552
71	Tumor	HIST1H1C	4.56535
72	Normal	HIST1H1C	4.23643
73	Tumor	HIST1H1C	4.73487
74	Normal	HIST1H1C	4.05315
75	Tumor	HIST1H1C	4.63703
76	Normal	HIST1H1C	4.40244
77	Tumor	HIST1H1C	4.19272
78	Normal	HIST1H1C	3.88429
79	Tumor	HIST1H1C	4.91454
80	Normal	HIST1H1C	4.21414
81	Tumor	HIST1H1C	4.04713
82	Normal	HIST1H1C	4.27345
83	Tumor	HIST1H1C	5.84671
84	Normal	HIST1H1C	4.52615
85	Tumor	HIST1H1C	4.78023
86	Normal	HIST1H1C	3.77878
87	Tumor	HIST1H1C	4.51828
88	Normal	HIST1H1C	4.2658
89	Tumor	HIST1H1C	4.66124
90	Normal	HIST1H1C	4.46246
91	Tumor	ANLN	3.47882
92	Normal	ANLN	2.60677
93	Tumor	ANLN	6.50617
94	Normal	ANLN	2.58761
95	Tumor	ANLN	6.54141
96	Normal	ANLN	3.2212
97	Tumor	ANLN	2.8657
98	Normal	ANLN	3.67616
99	Tumor	ANLN	6.30727
100	Normal	ANLN	2.39266
101	Tumor	ANLN	5.6749
102	Normal	ANLN	2.31978
103	Tumor	ANLN	4.8645
104	Normal	ANLN	2.82727
105	Tumor	ANLN	6.63963
106	Normal	ANLN	3.50161
107	Tumor	ANLN	5.59771
108	Normal	ANLN	2.7896
109	Tumor	ANLN	4.83582
110	Normal	ANLN	4.5487
111	Tumor	ANLN	5.4705
112	Normal	ANLN	2.41128
113	Tumor	ANLN	4.65137
114	Normal	ANLN	3.03549
115	Tumor	ANLN	4.5894
116	Normal	ANLN	2.63161
117	Tumor	ANLN	5.03825
118	Normal	ANLN	3.98126
119	Tumor	ANLN	6.32027
120	Normal	ANLN	5.34115
121	Tumor	ANLN	4.60516
122	Normal	ANLN	2.21213
123	Tumor	ANLN	2.9729
124	Normal	ANLN	2.4285
125	Tumor	ANLN	2.62136
126	Normal	ANLN	2.74331
127	Tumor	ANLN	5.58066
128	Normal	ANLN	3.8076
129	Tumor	ANLN	5.39491
130	Normal	ANLN	3.52011
131	Tumor	ANLN	5.18127
132	Normal	ANLN	2.63797
133	Tumor	ANLN	3.25994
134	Normal	ANLN	2.46668
135	Tumor	ANLN	3.77239
136	Normal	ANLN	2.51162
137	Tumor	ANLN	3.76953
138	Normal	ANLN	3.14225
139	Tumor	ANLN	5.60785
140	Normal	ANLN	2.4574
141	Tumor	ANLN	5.3211
142	Normal	ANLN	5.00239
143	Tumor	ANLN	4.41029
144	Normal	ANLN	4.92865
145	Tumor	ANLN	5.72891
146	Normal	ANLN	3.1278
147	Tumor	ANLN	4.45809
148	Normal	ANLN	2.59715
149	Tumor	ANLN	6.40543
150	Normal	ANLN	2.97712
151	Tumor	ANLN	5.14033
152	Normal	ANLN	3.28573
153	Tumor	ANLN	5.74829
154	Normal	ANLN	7.50529
155	Tumor	ANLN	5.31004
156	Normal	ANLN	3.00834
157	Tumor	ANLN	4.65762
158	Normal	ANLN	3.15421
159	Tumor	ANLN	6.2763
160	Normal	ANLN	4.40469
161	Tumor	ANLN	5.45188
162	Normal	ANLN	3.48395
163	Tumor	ANLN	4.95524
164	Normal	ANLN	2.4387
165	Tumor	ANLN	4.24957
166	Normal	ANLN	4.32826
167	Tumor	ANLN	4.34903
168	Normal	ANLN	3.53439
169	Tumor	ANLN	6.9702
170	Normal	ANLN	3.31353
171	Tumor	ANLN	2.80828
172	Normal	ANLN	2.86408
173	Tumor	ANLN	5.33341
174	Normal	ANLN	2.62277
175	Tumor	ANLN	4.68094
176	Normal	ANLN	2.42984
177	Tumor	ANLN	3.42937
178	Normal	ANLN	2.95879
179	Tumor	ANLN	4.14586
180	Normal	ANLN	3.84019
