# Supplementary material for: A two-gene-based prognostic signature for pancreatic cancer
Source: Aging (Albany NY). 2020 Sep 23;12(18):18322–42. doi: 10.18632/aging.103698 (PMC7585105; doi:10.18632/aging.103698)
Supplement: Supplementary Table 7 [file aging-12-103698-s004..xlsx]

## Sheet: Supplementary Table 7. The expr
	Type	Gene	Expression
1	Tumor	HIST1H1C	4.12679
2	Normal	HIST1H1C	3.70554
3	Tumor	HIST1H1C	4.98711
4	Normal	HIST1H1C	3.92952
5	Tumor	HIST1H1C	4.15622
6	Normal	HIST1H1C	3.78265
7	Tumor	HIST1H1C	3.31798
8	Normal	HIST1H1C	3.54564
9	Tumor	HIST1H1C	5.43205
10	Normal	HIST1H1C	3.21816
11	Tumor	HIST1H1C	4.13628
12	Normal	HIST1H1C	3.66603
13	Tumor	HIST1H1C	4.30992
14	Normal	HIST1H1C	3.62189
15	Tumor	HIST1H1C	4.43663
16	Normal	HIST1H1C	3.66069
17	Tumor	HIST1H1C	5.00248
18	Normal	HIST1H1C	3.81739
19	Tumor	HIST1H1C	4.33042
20	Normal	HIST1H1C	4.43232
21	Tumor	HIST1H1C	4.13002
22	Normal	HIST1H1C	3.76896
23	Tumor	HIST1H1C	4.23464
24	Normal	HIST1H1C	3.60665
25	Tumor	HIST1H1C	3.65612
26	Normal	HIST1H1C	3.89891
27	Tumor	HIST1H1C	3.97141
28	Normal	HIST1H1C	4.12894
29	Tumor	HIST1H1C	3.71772
30	Normal	HIST1H1C	3.96731
31	Tumor	HIST1H1C	4.06059
32	Normal	HIST1H1C	4.33216
33	Tumor	HIST1H1C	4.18399
34	Normal	HIST1H1C	4.07365
35	Tumor	HIST1H1C	3.97067
36	Normal	HIST1H1C	3.47751
37	Tumor	HIST1H1C	4.56965
38	Normal	HIST1H1C	3.66462
39	Tumor	HIST1H1C	4.393
40	Normal	HIST1H1C	3.79928
41	Tumor	HIST1H1C	4.06433
42	Normal	HIST1H1C	4.26197
43	Tumor	HIST1H1C	3.52144
44	Normal	HIST1H1C	3.77357
45	Tumor	HIST1H1C	3.91594
46	Normal	HIST1H1C	3.89845
47	Tumor	HIST1H1C	3.96775
48	Normal	HIST1H1C	3.74171
49	Tumor	HIST1H1C	4.83346
50	Normal	HIST1H1C	3.28068
51	Tumor	HIST1H1C	3.95767
52	Normal	HIST1H1C	3.77255
53	Tumor	HIST1H1C	4.67926
54	Normal	HIST1H1C	5.0495
55	Tumor	HIST1H1C	4.91585
56	Normal	HIST1H1C	3.25652
57	Tumor	HIST1H1C	4.29852
58	Normal	HIST1H1C	3.13749
59	Tumor	HIST1H1C	4.23719
60	Normal	HIST1H1C	4.22872
61	Tumor	HIST1H1C	4.46078
62	Normal	HIST1H1C	3.69473
63	Tumor	HIST1H1C	5.09688
64	Normal	HIST1H1C	4.76778
65	Tumor	HIST1H1C	4.16031
66	Normal	HIST1H1C	4.21809
67	Tumor	HIST1H1C	4.6307
68	Normal	HIST1H1C	3.74351
69	Tumor	HIST1H1C	4.99326
70	Normal	HIST1H1C	4.18442
71	Tumor	HIST1H1C	4.06568
72	Normal	HIST1H1C	3.74217
73	Tumor	HIST1H1C	4.27628
74	Normal	HIST1H1C	3.57075
75	Tumor	HIST1H1C	4.22586
76	Normal	HIST1H1C	3.9173
77	Tumor	HIST1H1C	3.73765
78	Normal	HIST1H1C	3.4554
79	Tumor	HIST1H1C	4.47962
80	Normal	HIST1H1C	3.78945
81	Tumor	HIST1H1C	3.53557
82	Normal	HIST1H1C	3.76057
83	Tumor	HIST1H1C	5.37403
84	Normal	HIST1H1C	4.09976
85	Tumor	HIST1H1C	4.38032
86	Normal	HIST1H1C	3.33053
87	Tumor	HIST1H1C	4.05165
88	Normal	HIST1H1C	3.816
89	Tumor	HIST1H1C	4.27313
90	Normal	HIST1H1C	4.07455
91	Normal	HIST1H1C	3.94772
92	Tumor	HIST1H1C	3.75688
93	Normal	HIST1H1C	3.75483
94	Tumor	HIST1H1C	4.36094
95	Tumor	HIST1H1C	4.1478
96	Tumor	HIST1H1C	3.59366
97	Normal	HIST1H1C	3.73717
98	Tumor	HIST1H1C	4.489
99	Normal	HIST1H1C	3.65845
100	Tumor	HIST1H1C	4.16856
101	Tumor	HIST1H1C	4.33005
102	Normal	HIST1H1C	4.20865
103	Tumor	HIST1H1C	4.3889
104	Normal	HIST1H1C	3.55054
105	Tumor	HIST1H1C	4.3838
106	Tumor	HIST1H1C	5.39991
107	Normal	HIST1H1C	5.29
108	Tumor	HIST1H1C	3.93641
109	Tumor	HIST1H1C	3.41511
110	Normal	HIST1H1C	4.30089
111	Tumor	HIST1H1C	3.40904
112	Tumor	HIST1H1C	3.77185
113	Normal	HIST1H1C	4.20845
114	Tumor	HIST1H1C	4.94558
115	Tumor	HIST1H1C	4.2593
116	Tumor	HIST1H1C	4.64468
117	Normal	HIST1H1C	3.76733
118	Normal	HIST1H1C	3.74835
119	Tumor	HIST1H1C	3.7319
120	Normal	HIST1H1C	4.02972
121	Tumor	HIST1H1C	4.9094
122	Normal	HIST1H1C	3.63813
123	Tumor	HIST1H1C	3.76176
124	Tumor	HIST1H1C	4.10187
125	Normal	HIST1H1C	4.91819
126	Tumor	HIST1H1C	4.33894
127	Normal	HIST1H1C	3.93596
128	Tumor	HIST1H1C	4.31078
129	Normal	HIST1H1C	3.52776
130	Tumor	HIST1H1C	4.06894
131	Tumor	ANLN	3.30449
132	Normal	ANLN	2.4753
133	Tumor	ANLN	6.24221
134	Normal	ANLN	2.41216
135	Tumor	ANLN	6.24855
136	Normal	ANLN	3.04569
137	Tumor	ANLN	2.70421
138	Normal	ANLN	3.47704
139	Tumor	ANLN	6.05268
140	Normal	ANLN	2.19387
141	Tumor	ANLN	5.44532
142	Normal	ANLN	2.16159
143	Tumor	ANLN	4.61887
144	Normal	ANLN	2.64592
145	Tumor	ANLN	6.36993
146	Normal	ANLN	3.32123
147	Tumor	ANLN	5.37796
148	Normal	ANLN	2.60176
149	Tumor	ANLN	4.61583
150	Normal	ANLN	4.35381
151	Tumor	ANLN	5.24413
152	Normal	ANLN	2.25902
153	Tumor	ANLN	4.42992
154	Normal	ANLN	2.88486
155	Tumor	ANLN	4.36072
156	Normal	ANLN	2.4825
157	Tumor	ANLN	4.78481
158	Normal	ANLN	3.75597
159	Tumor	ANLN	6.07577
160	Normal	ANLN	5.08943
161	Tumor	ANLN	4.38767
162	Normal	ANLN	2.03694
163	Tumor	ANLN	2.78382
164	Normal	ANLN	2.24071
165	Tumor	ANLN	2.43846
166	Normal	ANLN	2.57761
167	Tumor	ANLN	5.33543
168	Normal	ANLN	3.61849
169	Tumor	ANLN	5.14676
170	Normal	ANLN	3.33325
171	Tumor	ANLN	4.97087
172	Normal	ANLN	2.45884
173	Tumor	ANLN	3.08441
174	Normal	ANLN	2.30366
175	Tumor	ANLN	3.56354
176	Normal	ANLN	2.36387
177	Tumor	ANLN	3.54377
178	Normal	ANLN	2.94825
179	Tumor	ANLN	5.33757
180	Normal	ANLN	2.27779
181	Tumor	ANLN	5.05136
182	Normal	ANLN	4.77787
183	Tumor	ANLN	4.19111
184	Normal	ANLN	4.70529
185	Tumor	ANLN	5.51207
186	Normal	ANLN	2.93519
187	Tumor	ANLN	4.25832
188	Normal	ANLN	2.4556
189	Tumor	ANLN	6.13247
190	Normal	ANLN	2.81494
191	Tumor	ANLN	4.90338
192	Normal	ANLN	3.0841
193	Tumor	ANLN	5.4945
194	Normal	ANLN	7.22251
195	Tumor	ANLN	5.05075
196	Normal	ANLN	2.82475
197	Tumor	ANLN	4.42092
198	Normal	ANLN	2.97995
199	Tumor	ANLN	6.03729
200	Normal	ANLN	4.16811
201	Tumor	ANLN	5.19903
202	Normal	ANLN	3.277
203	Tumor	ANLN	4.72641
204	Normal	ANLN	2.23698
205	Tumor	ANLN	4.03955
206	Normal	ANLN	4.09579
207	Tumor	ANLN	4.14692
208	Normal	ANLN	3.32285
209	Tumor	ANLN	6.69572
210	Normal	ANLN	3.10394
211	Tumor	ANLN	2.64632
212	Normal	ANLN	2.66128
213	Tumor	ANLN	5.10327
214	Normal	ANLN	2.41044
215	Tumor	ANLN	4.48771
216	Normal	ANLN	2.24071
217	Tumor	ANLN	3.24435
218	Normal	ANLN	2.79809
219	Tumor	ANLN	3.93896
220	Normal	ANLN	3.65612
221	Normal	ANLN	3.72198
222	Tumor	ANLN	4.51494
223	Normal	ANLN	3.62774
224	Tumor	ANLN	5.71399
225	Tumor	ANLN	4.3838
226	Tumor	ANLN	3.61045
227	Normal	ANLN	3.2907
228	Tumor	ANLN	4.86155
229	Normal	ANLN	3.67486
230	Tumor	ANLN	6.10571
231	Tumor	ANLN	3.68424
232	Normal	ANLN	3.14684
233	Tumor	ANLN	5.96704
234	Normal	ANLN	2.97834
235	Tumor	ANLN	5.5088
236	Tumor	ANLN	5.70203
237	Normal	ANLN	5.41057
238	Tumor	ANLN	3.54431
239	Tumor	ANLN	5.16413
240	Normal	ANLN	3.71159
241	Tumor	ANLN	3.10915
242	Tumor	ANLN	3.11071
243	Normal	ANLN	2.96396
244	Tumor	ANLN	7.34982
245	Tumor	ANLN	5.19457
246	Tumor	ANLN	6.06837
247	Normal	ANLN	3.47974
248	Normal	ANLN	3.30032
249	Tumor	ANLN	3.65791
250	Normal	ANLN	3.11907
251	Tumor	ANLN	4.01421
252	Normal	ANLN	3.58863
253	Tumor	ANLN	3.28613
254	Tumor	ANLN	3.51011
255	Normal	ANLN	3.3983
256	Tumor	ANLN	3.68621
257	Normal	ANLN	2.82395
258	Tumor	ANLN	3.24745
259	Normal	ANLN	2.81355
260	Tumor	ANLN	3.53209
