# Supplementary material for: A two-gene-based prognostic signature for pancreatic cancer
Source: Aging (Albany NY). 2020 Sep 23;12(18):18322–42. doi: 10.18632/aging.103698 (PMC7585105; doi:10.18632/aging.103698)
Supplement: Supplementary Table 8 [file aging-12-103698-s005..xlsx]

## Sheet: Supplementary Table 8. The expr
	Type	Gene	Expression
1	Normal	HIST1H1C	1147
2	Normal	HIST1H1C	342
3	Normal	HIST1H1C	680
4	Normal	HIST1H1C	273
5	Tumor	HIST1H1C	956
6	Tumor	HIST1H1C	3961
7	Tumor	HIST1H1C	3677
8	Tumor	HIST1H1C	2741
9	Tumor	HIST1H1C	258
10	Tumor	HIST1H1C	2702
11	Tumor	HIST1H1C	2639
12	Tumor	HIST1H1C	463
13	Tumor	HIST1H1C	617
14	Tumor	HIST1H1C	4571
15	Tumor	HIST1H1C	3802
16	Tumor	HIST1H1C	1358
17	Tumor	HIST1H1C	905
18	Tumor	HIST1H1C	1341
19	Tumor	HIST1H1C	1664
20	Tumor	HIST1H1C	308
21	Tumor	HIST1H1C	754
22	Tumor	HIST1H1C	1477
23	Tumor	HIST1H1C	3706
24	Tumor	HIST1H1C	1799
25	Tumor	HIST1H1C	1293
26	Tumor	HIST1H1C	298
27	Tumor	HIST1H1C	4773
28	Tumor	HIST1H1C	1138
29	Tumor	HIST1H1C	699
30	Tumor	HIST1H1C	3801
31	Tumor	HIST1H1C	2577
32	Tumor	HIST1H1C	16934
33	Tumor	HIST1H1C	4220
34	Tumor	HIST1H1C	1697
35	Tumor	HIST1H1C	1273
36	Tumor	HIST1H1C	4897
37	Tumor	HIST1H1C	903
38	Tumor	HIST1H1C	3103
39	Tumor	HIST1H1C	2578
40	Tumor	HIST1H1C	5085
41	Tumor	HIST1H1C	758
42	Tumor	HIST1H1C	885
43	Tumor	HIST1H1C	558
44	Tumor	HIST1H1C	1264
45	Tumor	HIST1H1C	10094
46	Tumor	HIST1H1C	349
47	Tumor	HIST1H1C	376
48	Tumor	HIST1H1C	2368
49	Tumor	HIST1H1C	1959
50	Tumor	HIST1H1C	791
51	Tumor	HIST1H1C	8602
52	Tumor	HIST1H1C	1178
53	Tumor	HIST1H1C	6870
54	Tumor	HIST1H1C	1493
55	Tumor	HIST1H1C	1674
56	Tumor	HIST1H1C	2132
57	Tumor	HIST1H1C	1217
58	Tumor	HIST1H1C	3106
59	Tumor	HIST1H1C	651
60	Tumor	HIST1H1C	8121
61	Tumor	HIST1H1C	3618
62	Tumor	HIST1H1C	1074
63	Tumor	HIST1H1C	4572
64	Tumor	HIST1H1C	189
65	Tumor	HIST1H1C	776
66	Tumor	HIST1H1C	1349
67	Tumor	HIST1H1C	1749
68	Tumor	HIST1H1C	617
69	Tumor	HIST1H1C	924
70	Tumor	HIST1H1C	3759
71	Tumor	HIST1H1C	2645
72	Tumor	HIST1H1C	2322
73	Tumor	HIST1H1C	4325
74	Tumor	HIST1H1C	2107
75	Tumor	HIST1H1C	1027
76	Tumor	HIST1H1C	3343
77	Tumor	HIST1H1C	5924
78	Tumor	HIST1H1C	1897
79	Tumor	HIST1H1C	2891
80	Tumor	HIST1H1C	1069
81	Tumor	HIST1H1C	568
82	Tumor	HIST1H1C	5451
83	Tumor	HIST1H1C	912
84	Tumor	HIST1H1C	7699
85	Tumor	HIST1H1C	4189
86	Tumor	HIST1H1C	880
87	Tumor	HIST1H1C	2079
88	Tumor	HIST1H1C	4941
89	Tumor	HIST1H1C	2091
90	Tumor	HIST1H1C	3232
91	Tumor	HIST1H1C	1844
92	Tumor	HIST1H1C	8644
93	Tumor	HIST1H1C	765
94	Tumor	HIST1H1C	7708
95	Tumor	HIST1H1C	2958
96	Tumor	HIST1H1C	692
97	Tumor	HIST1H1C	856
98	Tumor	HIST1H1C	2387
99	Tumor	HIST1H1C	706
100	Tumor	HIST1H1C	399
101	Tumor	HIST1H1C	1270
102	Tumor	HIST1H1C	1862
103	Tumor	HIST1H1C	3451
104	Tumor	HIST1H1C	2152
105	Tumor	HIST1H1C	1266
106	Tumor	HIST1H1C	1356
107	Tumor	HIST1H1C	1301
108	Tumor	HIST1H1C	6736
109	Tumor	HIST1H1C	1125
110	Tumor	HIST1H1C	601
111	Tumor	HIST1H1C	2305
112	Tumor	HIST1H1C	1145
113	Tumor	HIST1H1C	5533
114	Tumor	HIST1H1C	3058
115	Tumor	HIST1H1C	2454
116	Tumor	HIST1H1C	552
117	Tumor	HIST1H1C	599
118	Tumor	HIST1H1C	1425
119	Tumor	HIST1H1C	4881
120	Tumor	HIST1H1C	258
121	Tumor	HIST1H1C	2750
122	Tumor	HIST1H1C	4249
123	Tumor	HIST1H1C	3308
124	Tumor	HIST1H1C	1701
125	Tumor	HIST1H1C	648
126	Tumor	HIST1H1C	2021
127	Tumor	HIST1H1C	1345
128	Tumor	HIST1H1C	1030
129	Tumor	HIST1H1C	2771
130	Tumor	HIST1H1C	3095
131	Tumor	HIST1H1C	1383
132	Tumor	HIST1H1C	2521
133	Tumor	HIST1H1C	1977
134	Tumor	HIST1H1C	1478
135	Tumor	HIST1H1C	1132
136	Tumor	HIST1H1C	8168
137	Tumor	HIST1H1C	2288
138	Tumor	HIST1H1C	891
139	Tumor	HIST1H1C	2546
140	Tumor	HIST1H1C	1479
141	Tumor	HIST1H1C	832
142	Tumor	HIST1H1C	981
143	Tumor	HIST1H1C	357
144	Tumor	HIST1H1C	724
145	Tumor	HIST1H1C	1158
146	Tumor	HIST1H1C	1612
147	Tumor	HIST1H1C	1990
148	Tumor	HIST1H1C	2182
149	Tumor	HIST1H1C	2934
150	Tumor	HIST1H1C	1641
151	Tumor	HIST1H1C	1614
152	Tumor	HIST1H1C	1928
153	Tumor	HIST1H1C	2781
154	Tumor	HIST1H1C	3786
155	Tumor	HIST1H1C	1202
156	Tumor	HIST1H1C	5338
157	Tumor	HIST1H1C	1642
158	Tumor	HIST1H1C	2332
159	Tumor	HIST1H1C	2700
160	Tumor	HIST1H1C	961
161	Tumor	HIST1H1C	122
162	Tumor	HIST1H1C	560
163	Tumor	HIST1H1C	1156
164	Tumor	HIST1H1C	1245
165	Tumor	HIST1H1C	1934
166	Tumor	HIST1H1C	963
167	Tumor	HIST1H1C	487
168	Tumor	HIST1H1C	2090
169	Tumor	HIST1H1C	5187
170	Tumor	HIST1H1C	876
171	Tumor	HIST1H1C	991
172	Tumor	HIST1H1C	1058
173	Tumor	HIST1H1C	8374
174	Tumor	HIST1H1C	449
175	Tumor	HIST1H1C	1127
176	Tumor	HIST1H1C	1268
177	Tumor	HIST1H1C	1278
178	Tumor	HIST1H1C	1039
179	Tumor	HIST1H1C	3673
180	Tumor	HIST1H1C	552
181	Tumor	HIST1H1C	2993
182	Tumor	HIST1H1C	424
183	Normal	ANLN	439
184	Normal	ANLN	278
185	Normal	ANLN	356
186	Normal	ANLN	238
187	Tumor	ANLN	738
188	Tumor	ANLN	2007
189	Tumor	ANLN	1477
190	Tumor	ANLN	910
191	Tumor	ANLN	66
192	Tumor	ANLN	1823
193	Tumor	ANLN	666
194	Tumor	ANLN	2066
195	Tumor	ANLN	1542
196	Tumor	ANLN	1178
197	Tumor	ANLN	2882
198	Tumor	ANLN	337
199	Tumor	ANLN	6671
200	Tumor	ANLN	1388
201	Tumor	ANLN	228
202	Tumor	ANLN	621
203	Tumor	ANLN	3482
204	Tumor	ANLN	1916
205	Tumor	ANLN	5197
206	Tumor	ANLN	884
207	Tumor	ANLN	249
208	Tumor	ANLN	180
209	Tumor	ANLN	79
210	Tumor	ANLN	1462
211	Tumor	ANLN	867
212	Tumor	ANLN	1425
213	Tumor	ANLN	563
214	Tumor	ANLN	610
215	Tumor	ANLN	507
216	Tumor	ANLN	1527
217	Tumor	ANLN	2012
218	Tumor	ANLN	1361
219	Tumor	ANLN	1037
220	Tumor	ANLN	2337
221	Tumor	ANLN	932
222	Tumor	ANLN	2088
223	Tumor	ANLN	2239
224	Tumor	ANLN	561
225	Tumor	ANLN	46
226	Tumor	ANLN	650
227	Tumor	ANLN	1821
228	Tumor	ANLN	207
229	Tumor	ANLN	478
230	Tumor	ANLN	1877
231	Tumor	ANLN	951
232	Tumor	ANLN	1019
233	Tumor	ANLN	563
234	Tumor	ANLN	2592
235	Tumor	ANLN	1625
236	Tumor	ANLN	750
237	Tumor	ANLN	589
238	Tumor	ANLN	270
239	Tumor	ANLN	1237
240	Tumor	ANLN	673
241	Tumor	ANLN	1159
242	Tumor	ANLN	2195
243	Tumor	ANLN	5230
244	Tumor	ANLN	535
245	Tumor	ANLN	2715
246	Tumor	ANLN	641
247	Tumor	ANLN	217
248	Tumor	ANLN	656
249	Tumor	ANLN	1361
250	Tumor	ANLN	1836
251	Tumor	ANLN	18
252	Tumor	ANLN	5979
253	Tumor	ANLN	2614
254	Tumor	ANLN	617
255	Tumor	ANLN	2696
256	Tumor	ANLN	1604
257	Tumor	ANLN	1253
258	Tumor	ANLN	3096
259	Tumor	ANLN	810
260	Tumor	ANLN	3257
261	Tumor	ANLN	1377
262	Tumor	ANLN	426
263	Tumor	ANLN	485
264	Tumor	ANLN	4453
265	Tumor	ANLN	349
266	Tumor	ANLN	1794
267	Tumor	ANLN	1361
268	Tumor	ANLN	6427
269	Tumor	ANLN	275
270	Tumor	ANLN	458
271	Tumor	ANLN	4269
272	Tumor	ANLN	1490
273	Tumor	ANLN	1012
274	Tumor	ANLN	1904
275	Tumor	ANLN	191
276	Tumor	ANLN	1951
277	Tumor	ANLN	2299
278	Tumor	ANLN	803
279	Tumor	ANLN	681
280	Tumor	ANLN	2734
281	Tumor	ANLN	476
282	Tumor	ANLN	320
283	Tumor	ANLN	981
284	Tumor	ANLN	1831
285	Tumor	ANLN	1641
286	Tumor	ANLN	415
287	Tumor	ANLN	1120
288	Tumor	ANLN	1352
289	Tumor	ANLN	4468
290	Tumor	ANLN	1577
291	Tumor	ANLN	486
292	Tumor	ANLN	350
293	Tumor	ANLN	363
294	Tumor	ANLN	879
295	Tumor	ANLN	860
296	Tumor	ANLN	1185
297	Tumor	ANLN	1164
298	Tumor	ANLN	1299
299	Tumor	ANLN	699
300	Tumor	ANLN	868
301	Tumor	ANLN	3022
302	Tumor	ANLN	638
303	Tumor	ANLN	608
304	Tumor	ANLN	920
305	Tumor	ANLN	2243
306	Tumor	ANLN	582
307	Tumor	ANLN	1028
308	Tumor	ANLN	1075
309	Tumor	ANLN	578
310	Tumor	ANLN	1088
311	Tumor	ANLN	3091
312	Tumor	ANLN	972
313	Tumor	ANLN	509
314	Tumor	ANLN	1685
315	Tumor	ANLN	641
316	Tumor	ANLN	24
317	Tumor	ANLN	403
318	Tumor	ANLN	3044
319	Tumor	ANLN	1280
320	Tumor	ANLN	1640
321	Tumor	ANLN	916
322	Tumor	ANLN	529
323	Tumor	ANLN	1864
324	Tumor	ANLN	936
325	Tumor	ANLN	488
326	Tumor	ANLN	1230
327	Tumor	ANLN	3138
328	Tumor	ANLN	1334
329	Tumor	ANLN	522
330	Tumor	ANLN	803
331	Tumor	ANLN	40
332	Tumor	ANLN	2602
333	Tumor	ANLN	2882
334	Tumor	ANLN	4988
335	Tumor	ANLN	621
336	Tumor	ANLN	2348
337	Tumor	ANLN	563
338	Tumor	ANLN	1424
339	Tumor	ANLN	1168
340	Tumor	ANLN	2020
341	Tumor	ANLN	925
342	Tumor	ANLN	1452
343	Tumor	ANLN	45
344	Tumor	ANLN	388
345	Tumor	ANLN	48
346	Tumor	ANLN	1818
347	Tumor	ANLN	618
348	Tumor	ANLN	576
349	Tumor	ANLN	270
350	Tumor	ANLN	1795
351	Tumor	ANLN	4495
352	Tumor	ANLN	2233
353	Tumor	ANLN	283
354	Tumor	ANLN	940
355	Tumor	ANLN	1064
356	Tumor	ANLN	1363
357	Tumor	ANLN	1195
358	Tumor	ANLN	482
359	Tumor	ANLN	2240
360	Tumor	ANLN	5315
361	Tumor	ANLN	984
362	Tumor	ANLN	1251
363	Tumor	ANLN	3097
364	Tumor	ANLN	21
