# Supplementary material for: A two-gene-based prognostic signature for pancreatic cancer
Source: Aging (Albany NY). 2020 Sep 23;12(18):18322–42. doi: 10.18632/aging.103698 (PMC7585105; doi:10.18632/aging.103698)
Supplement: Supplementary Table 10 [file aging-12-103698-s002..xlsx]

## Sheet: Supplementary Table 10. The two
	id	fustat	futime	riskscore	groupby
1	TCGA-2J-AAB4	0	1.99726	0.882835	Low risk
2	TCGA-2J-AAB6	1	0.80274	2.873	High risk
3	TCGA-2J-AAB8	0	0.219178	0.812623	Low risk
4	TCGA-2J-AAB9	1	1.71781	0.575188	Low risk
5	TCGA-2J-AABA	1	1.66301	0.668724	Low risk
6	TCGA-2J-AABE	0	1.85205	0.644278	Low risk
7	TCGA-2J-AABF	1	1.89315	1.38348	High risk
8	TCGA-2J-AABH	0	3.52603	0.868387	Low risk
9	TCGA-2J-AABI	0	2.65479	1.73472	High risk
10	TCGA-2J-AABK	0	1.32603	0.88407	Low risk
11	TCGA-2J-AABO	0	1.20548	0.631997	Low risk
12	TCGA-2J-AABR	0	1.2	0.720596	Low risk
13	TCGA-2J-AABT	0	0.873973	0.604304	Low risk
14	TCGA-2J-AABU	1	0.758904	0.744347	Low risk
15	TCGA-2J-AABV	1	1.7863	0.519691	Low risk
16	TCGA-2L-AAQA	1	0.391781	1.61275	High risk
17	TCGA-2L-AAQE	1	1.87397	0.764167	Low risk
18	TCGA-2L-AAQI	1	0.282192	1.22037	High risk
19	TCGA-2L-AAQJ	1	1.07945	0.887159	Low risk
20	TCGA-2L-AAQL	1	0.8	0.611465	Low risk
21	TCGA-3A-A9I7	0	3.62466	0.805536	Low risk
22	TCGA-3A-A9I9	1	1.73699	0.77485	Low risk
23	TCGA-3A-A9IB	1	0.613699	1.03327	Low risk
24	TCGA-3A-A9IC	1	2.02192	1.95486	High risk
25	TCGA-3A-A9IH	0	2.79726	1.15853	Low risk
26	TCGA-3A-A9IU	1	1.25479	1.47521	High risk
27	TCGA-3A-A9IX	0	2.8411	0.667081	Low risk
28	TCGA-3A-A9IZ	1	0.843836	1.91633	High risk
29	TCGA-3A-A9J0	0	2.03562	1.08969	Low risk
30	TCGA-3E-AAAY	0	6.26027	0.75068	Low risk
31	TCGA-3E-AAAZ	1	5.97808	1.16614	Low risk
32	TCGA-F2-6879	1	0.915068	2.91358	High risk
33	TCGA-F2-6880	0	0.791781	0.528649	Low risk
34	TCGA-F2-7273	1	1.62192	0.755167	Low risk
35	TCGA-F2-7276	1	0.591781	0.61337	Low risk
36	TCGA-F2-A44G	1	0.638356	1.17588	High risk
37	TCGA-F2-A44H	0	1.60548	0.557748	Low risk
38	TCGA-F2-A7TX	1	0.260274	3.89363	High risk
39	TCGA-F2-A8YN	0	1.41644	0.816984	Low risk
40	TCGA-FB-A4P5	1	0.490411	0.626599	Low risk
41	TCGA-FB-A4P6	0	2.10137	0.564057	Low risk
42	TCGA-FB-A545	1	2.00548	2.83901	High risk
43	TCGA-FB-A5VM	1	1.36438	0.871777	Low risk
44	TCGA-FB-A78T	1	1.0274	1.01517	Low risk
45	TCGA-FB-AAPP	1	1.32877	1.06621	Low risk
46	TCGA-FB-AAPQ	1	3.09589	0.734075	Low risk
47	TCGA-FB-AAPS	0	0.624658	0.576506	Low risk
48	TCGA-FB-AAPU	1	1.04384	1.55887	High risk
49	TCGA-FB-AAPY	1	2.90137	0.828822	Low risk
50	TCGA-FB-AAPZ	0	1.96164	0.827537	Low risk
51	TCGA-FB-AAQ0	1	1.29589	1.02819	Low risk
52	TCGA-FB-AAQ1	1	0.336986	3.98782	High risk
53	TCGA-FB-AAQ2	1	0.419178	4.62707	High risk
54	TCGA-FB-AAQ3	1	0.0849315	1.16383	Low risk
55	TCGA-FB-AAQ6	1	0.668493	0.641887	Low risk
56	TCGA-H6-8124	0	1.07397	1.86207	High risk
57	TCGA-H6-A45N	1	1.15342	0.590454	Low risk
58	TCGA-H8-A6C1	0	1.83836	1.09483	Low risk
59	TCGA-HV-A5A3	1	0.350685	0.619626	Low risk
60	TCGA-HV-A5A4	0	0.635616	0.685762	Low risk
61	TCGA-HV-A5A5	0	0.791781	0.711367	Low risk
62	TCGA-HV-A5A6	1	5.57808	1.70357	High risk
63	TCGA-HV-A7OL	0	0.690411	0.739621	Low risk
64	TCGA-HV-A7OP	0	2.67945	0.706751	Low risk
65	TCGA-HV-AA8V	0	2.52055	0.7553	Low risk
66	TCGA-HV-AA8X	1	1.45753	1.84393	High risk
67	TCGA-HZ-7289	1	1.81096	1.09739	Low risk
68	TCGA-HZ-7918	0	2.65479	0.824681	Low risk
69	TCGA-HZ-7919	1	1.62466	1.91395	High risk
70	TCGA-HZ-7920	1	0.646575	0.635773	Low risk
71	TCGA-HZ-7922	0	0.0109589	1.06037	Low risk
72	TCGA-HZ-7923	0	0.860274	0.622427	Low risk
73	TCGA-HZ-7924	0	2.30137	1.60262	High risk
74	TCGA-HZ-7925	1	1.68219	2.13168	High risk
75	TCGA-HZ-7926	1	1.41918	1.44236	High risk
76	TCGA-HZ-8001	0	1.93425	0.823773	Low risk
77	TCGA-HZ-8002	1	1.00274	0.937467	Low risk
78	TCGA-HZ-8003	1	1.63288	0.732484	Low risk
79	TCGA-HZ-8005	1	0.328767	6.48394	High risk
80	TCGA-HZ-8315	1	0.819178	0.791597	Low risk
81	TCGA-HZ-8317	1	1.03562	1.02117	Low risk
82	TCGA-HZ-8519	0	1.24384	0.789995	Low risk
83	TCGA-HZ-8636	1	1.49315	1.46804	High risk
84	TCGA-HZ-8637	1	1.41644	1.21841	High risk
85	TCGA-HZ-A49G	0	1.80822	0.619041	Low risk
86	TCGA-HZ-A49H	0	1.34521	0.594461	Low risk
87	TCGA-HZ-A49I	1	0.843836	0.596657	Low risk
88	TCGA-HZ-A4BH	0	0.531507	1.10566	Low risk
89	TCGA-HZ-A4BK	0	1.8	0.699564	Low risk
90	TCGA-HZ-A77O	1	0.438356	2.09464	High risk
91	TCGA-HZ-A77P	0	0.90411	0.831486	Low risk
92	TCGA-HZ-A77Q	0	0.090411	0.667457	Low risk
93	TCGA-HZ-A8P1	0	0.0191781	0.726482	Low risk
94	TCGA-HZ-A9TJ	0	1.65205	0.819774	Low risk
95	TCGA-IB-7644	1	1.07945	1.09214	Low risk
96	TCGA-IB-7645	1	4.11507	0.726259	Low risk
97	TCGA-IB-7646	1	0.39726	6.27563	High risk
98	TCGA-IB-7649	1	1.27945	0.585856	Low risk
99	TCGA-IB-7651	1	1.65205	1.42972	High risk
100	TCGA-IB-7652	0	3.05753	1.43989	High risk
101	TCGA-IB-7654	1	1.30411	0.785053	Low risk
102	TCGA-IB-7885	0	3.44384	1.90878	High risk
103	TCGA-IB-7886	1	0.336986	1.11577	Low risk
104	TCGA-IB-7887	1	0.30137	1.24085	High risk
105	TCGA-IB-7888	1	3.64932	0.697937	Low risk
106	TCGA-IB-7889	1	1.31781	0.796151	Low risk
107	TCGA-IB-7890	1	1.63836	1.16728	Low risk
108	TCGA-IB-7891	1	2.50137	0.914589	Low risk
109	TCGA-IB-7893	1	0.320548	5.89172	High risk
110	TCGA-IB-7897	1	1.33151	0.78528	Low risk
111	TCGA-IB-8126	0	1.26575	0.567731	Low risk
112	TCGA-IB-8127	0	1.43014	1.38716	High risk
113	TCGA-IB-A5SO	1	1	0.935378	Low risk
114	TCGA-IB-A5SP	0	1.32055	0.727951	Low risk
115	TCGA-IB-A5SQ	1	0.6	1.5729	High risk
116	TCGA-IB-A5SS	1	1.26027	1.88113	High risk
117	TCGA-IB-A5ST	0	1.73973	0.689371	Low risk
118	TCGA-IB-A6UF	0	1.82466	1.07152	Low risk
119	TCGA-IB-A6UG	1	0.112329	1.10264	Low risk
120	TCGA-IB-A7LX	1	0.684932	4.00955	High risk
121	TCGA-IB-A7M4	0	1.32329	0.915092	Low risk
122	TCGA-IB-AAUM	0	0.0219178	0.537598	Low risk
123	TCGA-IB-AAUN	1	0.394521	2.00395	High risk
124	TCGA-IB-AAUO	1	0.654795	1.16831	Low risk
125	TCGA-IB-AAUP	0	1.18082	0.714499	Low risk
126	TCGA-IB-AAUQ	1	0.50137	0.903343	Low risk
127	TCGA-IB-AAUR	0	0.926027	0.535852	Low risk
128	TCGA-IB-AAUS	0	0.616438	0.666454	Low risk
129	TCGA-IB-AAUU	0	0.671233	0.939589	Low risk
130	TCGA-IB-AAUV	0	1.10685	0.542331	Low risk
131	TCGA-IB-AAUW	1	0.630137	0.590379	Low risk
132	TCGA-L1-A7W4	1	0.761644	4.65253	High risk
133	TCGA-LB-A7SX	1	1.07671	1.56865	High risk
134	TCGA-LB-A8F3	0	1.03836	0.649112	Low risk
135	TCGA-LB-A9Q5	1	0.857534	0.743838	Low risk
136	TCGA-M8-A5N4	0	1.6	0.799895	Low risk
137	TCGA-OE-A75W	1	0.731507	2.34094	High risk
138	TCGA-PZ-A5RE	1	1.28767	1.3848	High risk
139	TCGA-Q3-A5QY	0	1.13973	0.61294	Low risk
140	TCGA-Q3-AA2A	0	0.260274	0.603072	Low risk
141	TCGA-RB-A7B8	1	1.27671	0.637669	Low risk
142	TCGA-RB-AA9M	0	0.783562	0.958746	Low risk
143	TCGA-RL-AAAS	0	0.0246575	0.571883	Low risk
144	TCGA-S4-A8RM	0	2.01918	1.09345	Low risk
145	TCGA-S4-A8RO	0	1.43836	2.2086	High risk
146	TCGA-S4-A8RP	1	1.92329	0.711303	Low risk
147	TCGA-US-A774	1	1.90411	0.825763	Low risk
148	TCGA-US-A779	1	1.4	0.796255	Low risk
149	TCGA-US-A77E	1	1.17808	0.812935	Low risk
150	TCGA-US-A77G	1	0.0328767	0.997805	Low risk
151	TCGA-US-A77J	1	1.55616	0.561175	Low risk
152	TCGA-XD-AAUG	0	1.15068	0.509709	Low risk
153	TCGA-XD-AAUH	0	1.08219	0.580502	Low risk
154	TCGA-XD-AAUI	1	1.00274	0.893352	Low risk
155	TCGA-XD-AAUL	0	1.36438	0.877149	Low risk
156	TCGA-XN-A8T3	0	2.60548	1.0168	Low risk
157	TCGA-XN-A8T5	0	1.9726	0.646962	Low risk
158	TCGA-YB-A89D	0	0.958904	0.66072	Low risk
159	TCGA-YY-A8LH	0	5.52329	1.15602	Low risk
160	TCGA-Z5-AAPL	0	1.27945	0.646713	Low risk
